# Supplementary material
Source: PubMed Central journal article supplement (PMC6828549)

# Supplementary Data Set 1 - Uncropped western blot and gel images

"M" indicates protein molecular weight marker and the square box indicates the cropped regions

Figure 1b

anti-Panx

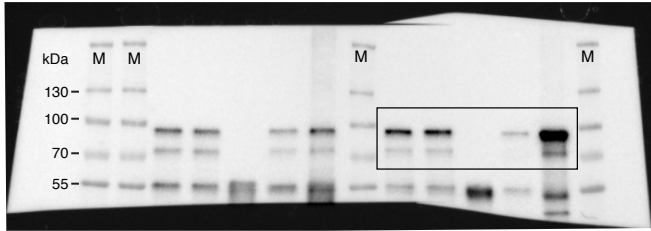

anti-Nxf2

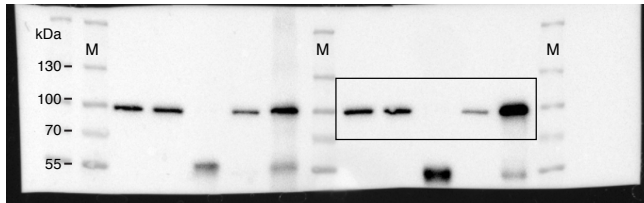

anti-Piwi

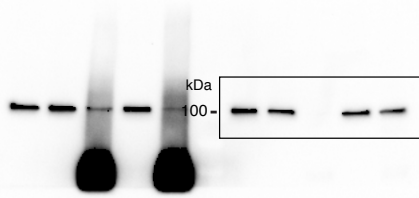

Figure 1d

anti-Nxf2

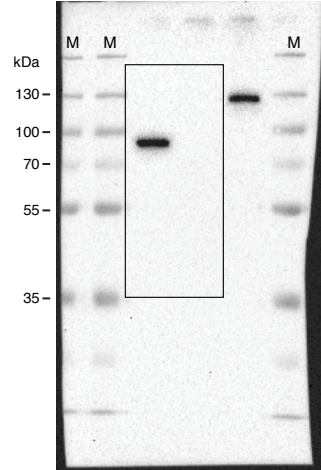

anti-ATP5A (stripped, re-probed)

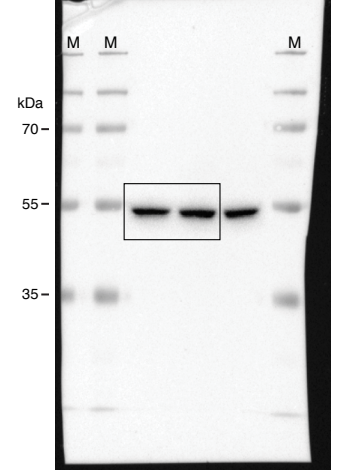

Supplementary Figure 2j

anti-Nxf2

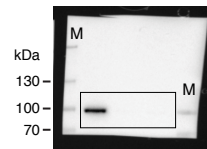

anti-ATP5A

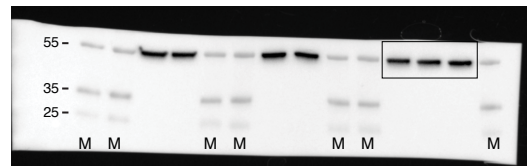

Figure 2a

right panel

middle panel

left panel

anti-Piwi

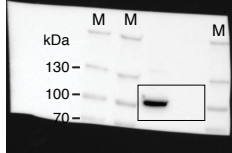

anti-Panx

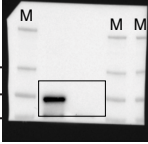

anti-Nxf2

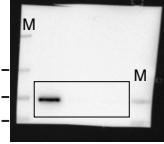

anti-ATP5A

right panel

middle panel

left panel

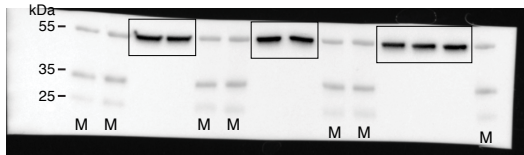

Supplementary Figure 3c

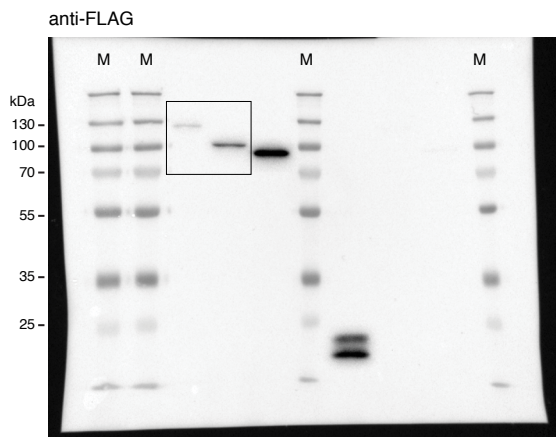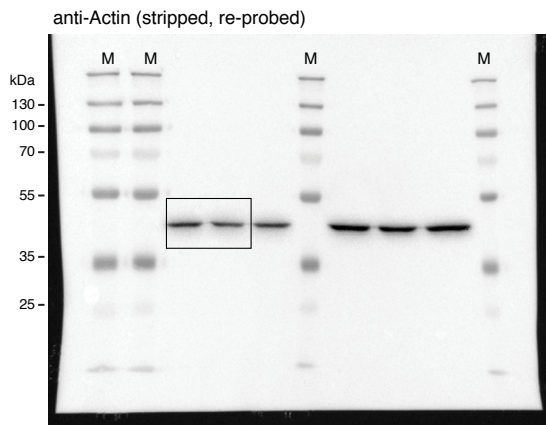

Supplementary Figure 3e

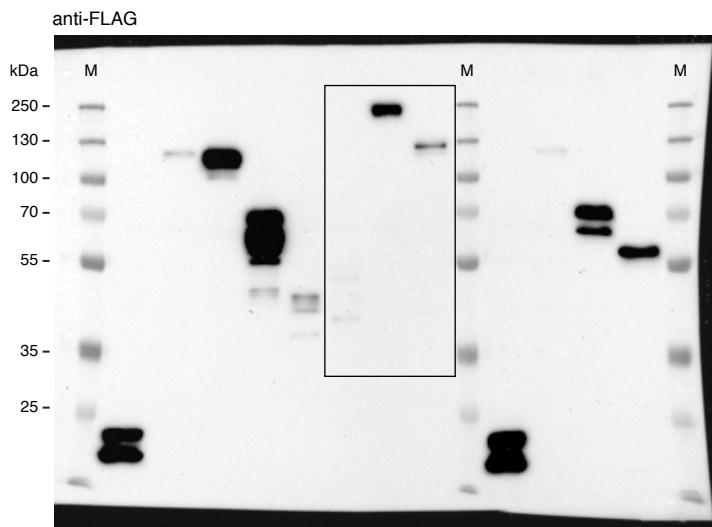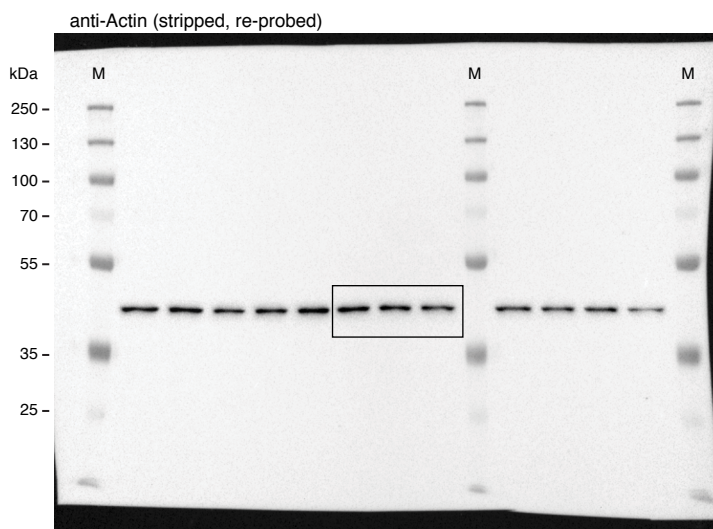

Supplementary Figure 3d

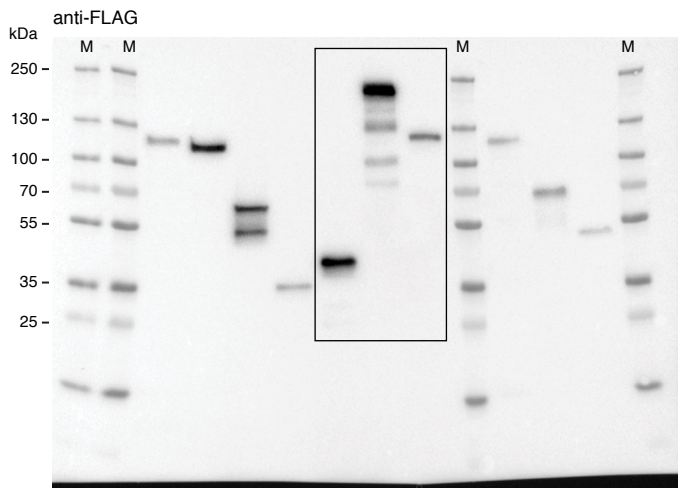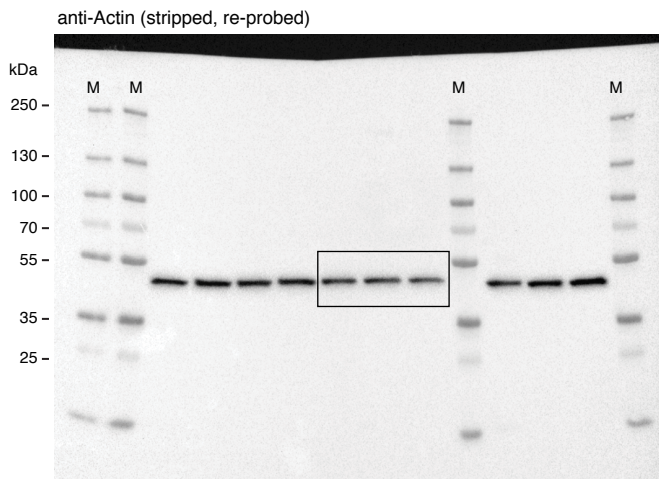

Supplementary Figure 3f

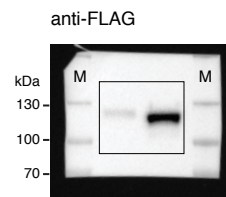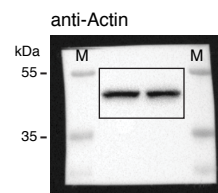

Figure 4a

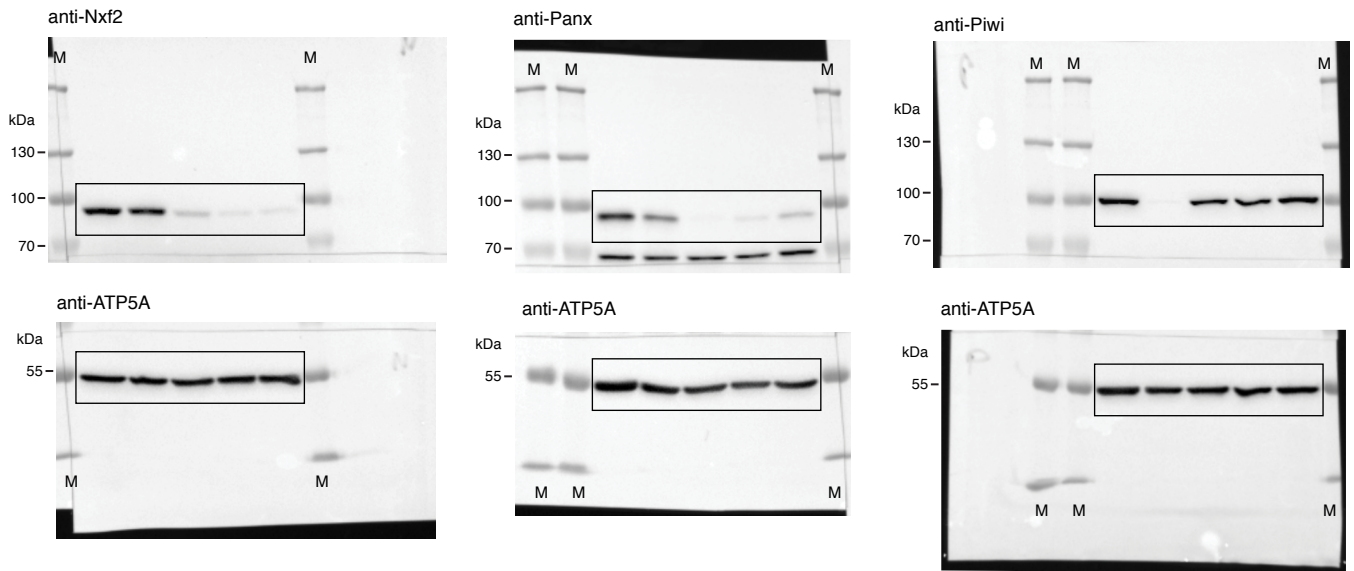

Figure 4c

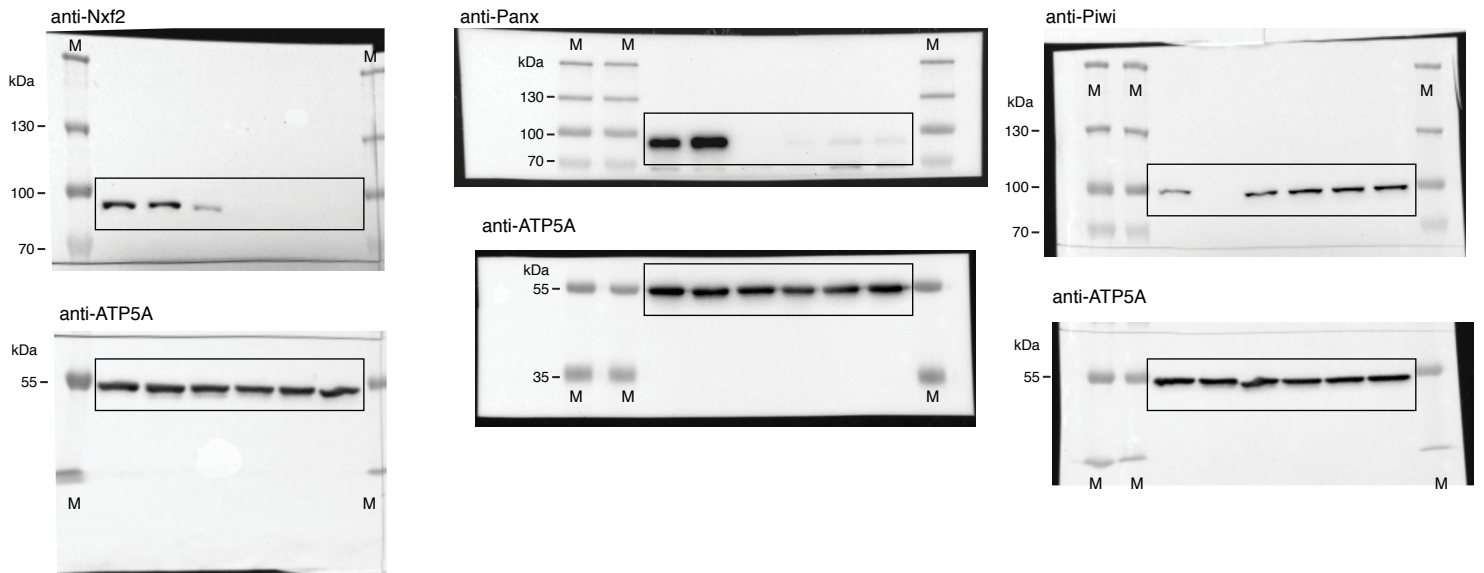

Figure 4g

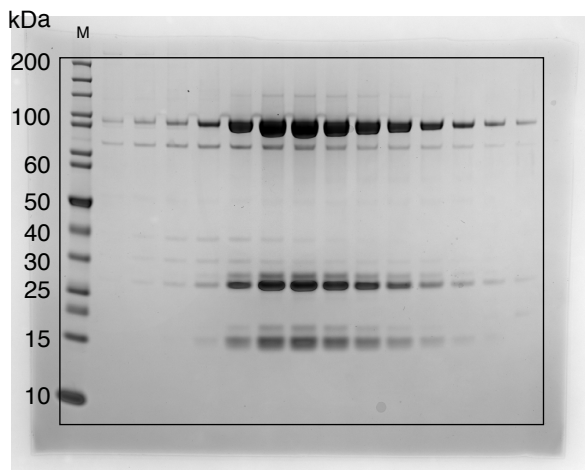

Supplementary Figure 4c

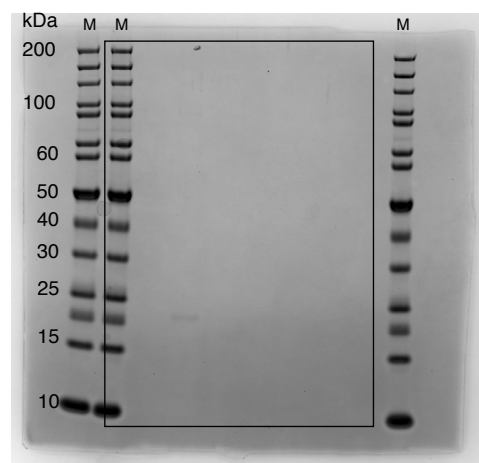

Figure 5b

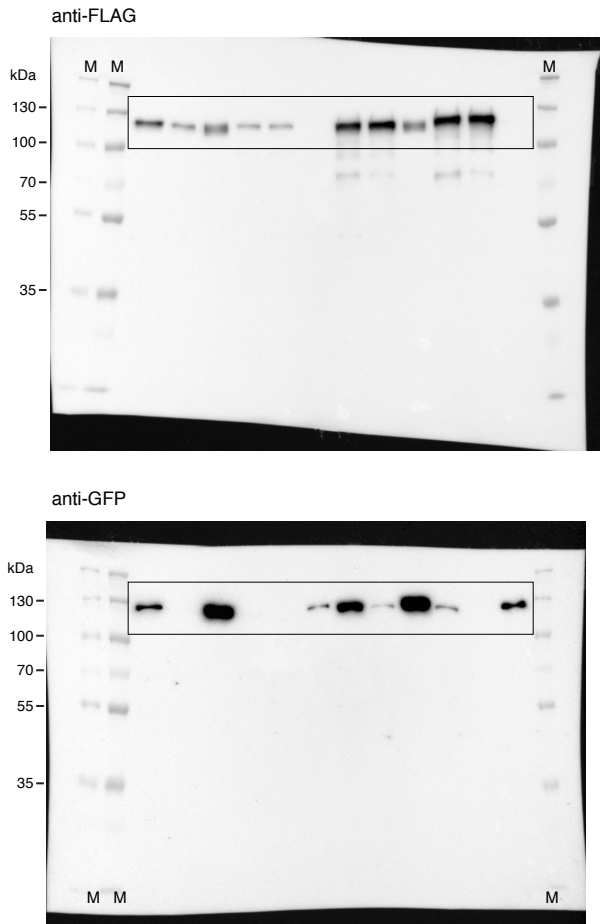

Figure 5g

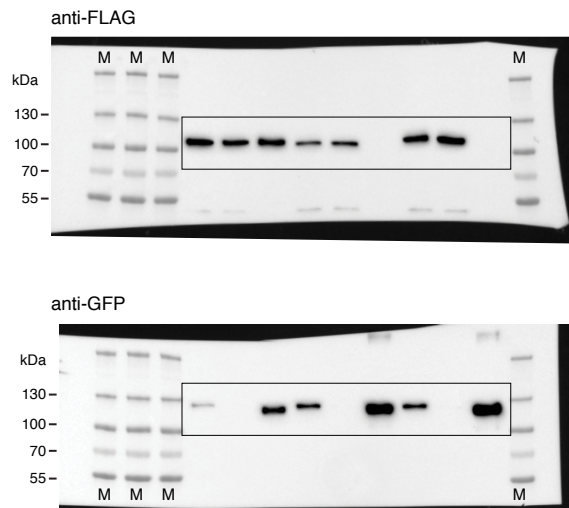

Supplementary Figure 5a

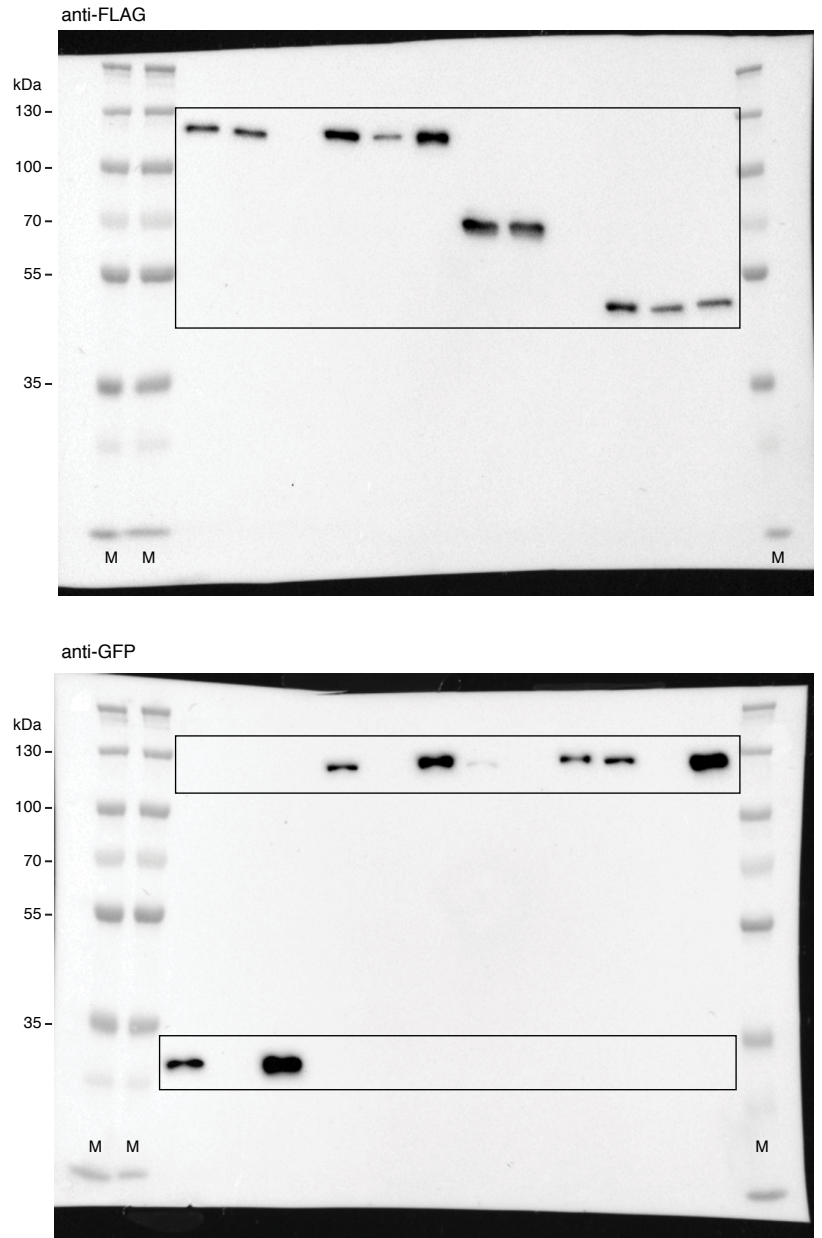

Supplementary Figure 5b

anti-FLAG

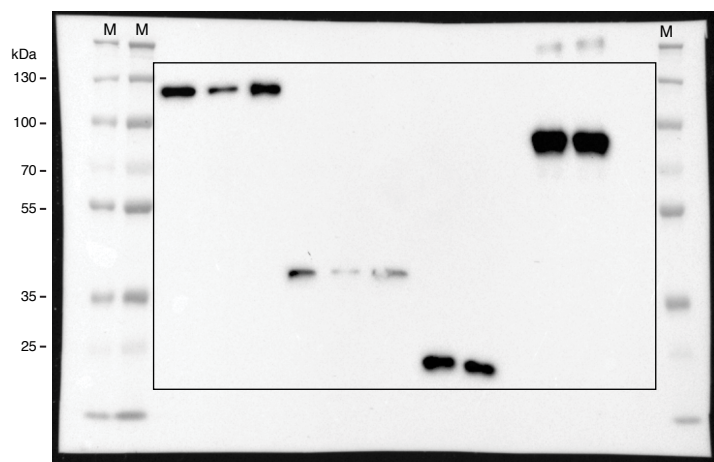

anti-GFP

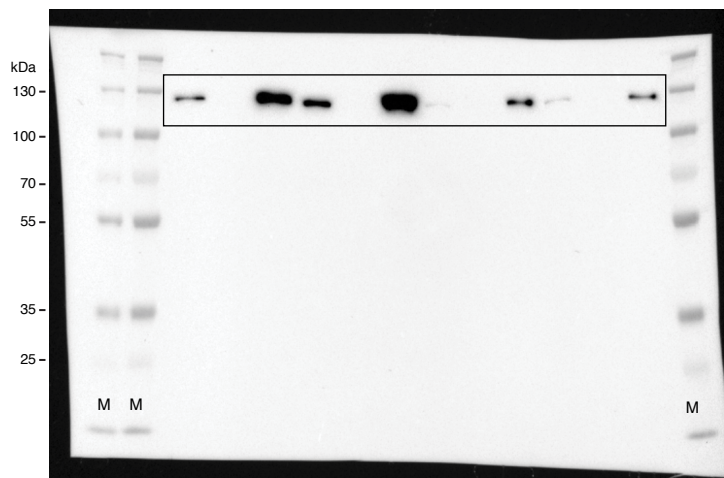

Supplementary Figure 5c

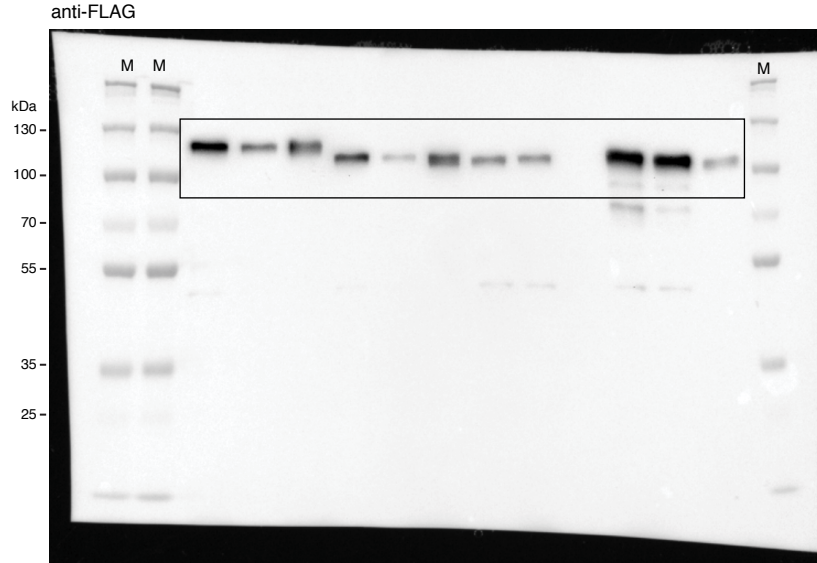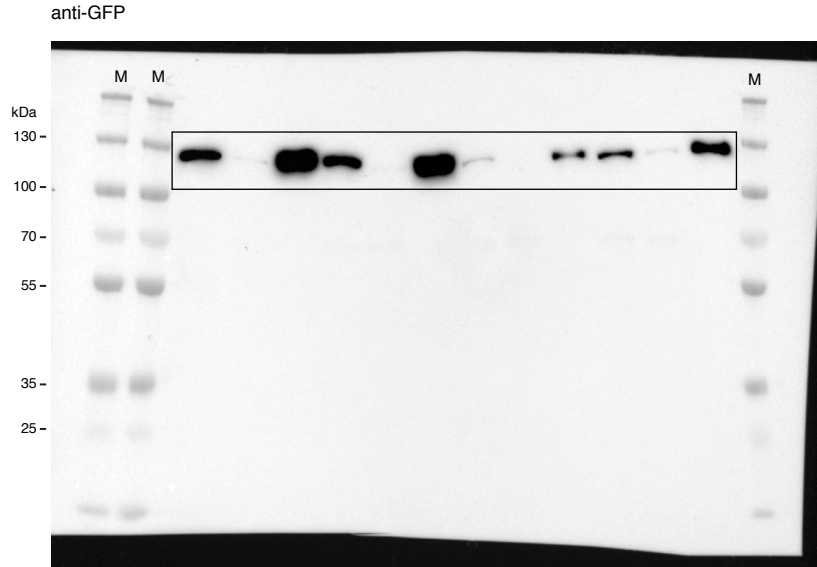

Supplementary Figure 5f

anti-FLAG

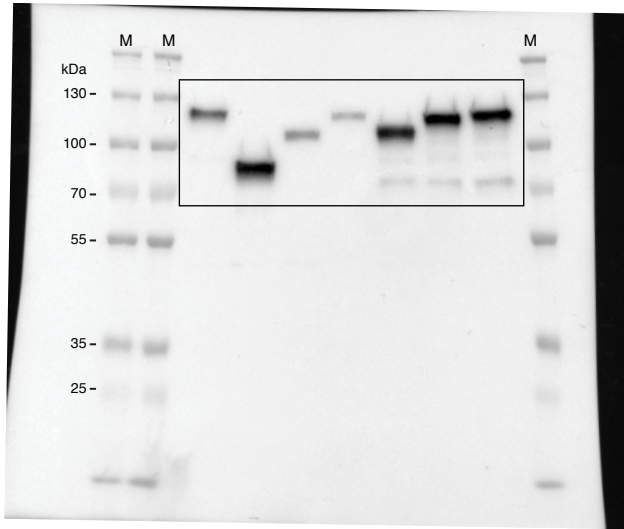

anti-Actin (stripped, re-probed)

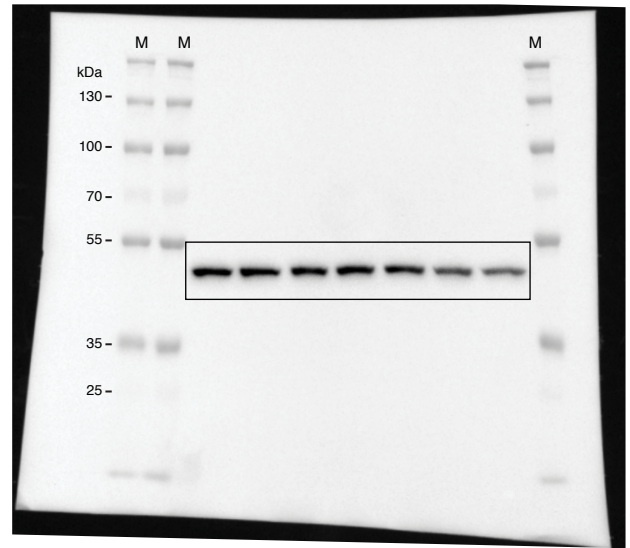

Supplementary Figure 5h

anti-FLAG

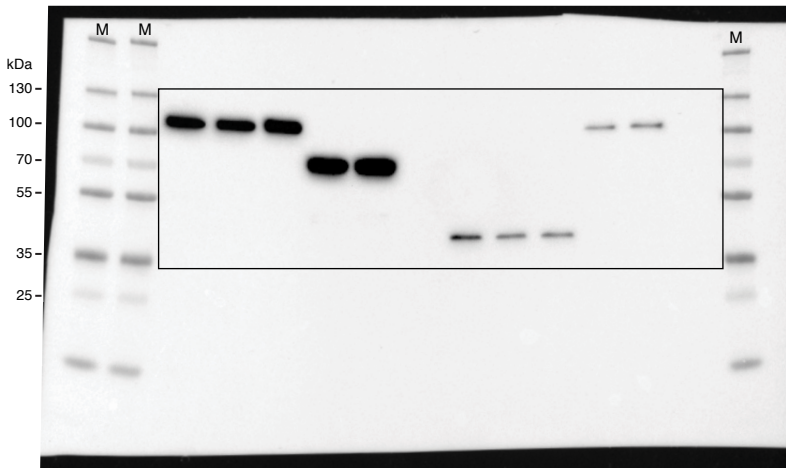

anti-GFP

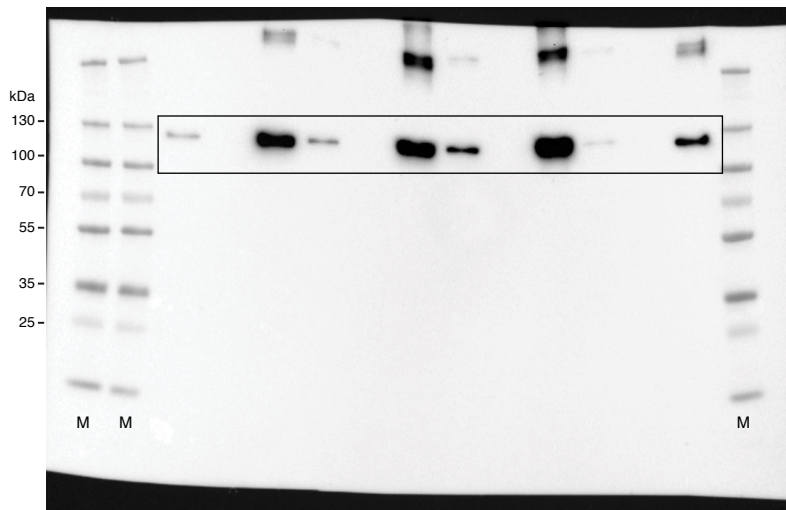

Supplementary Figure 5i

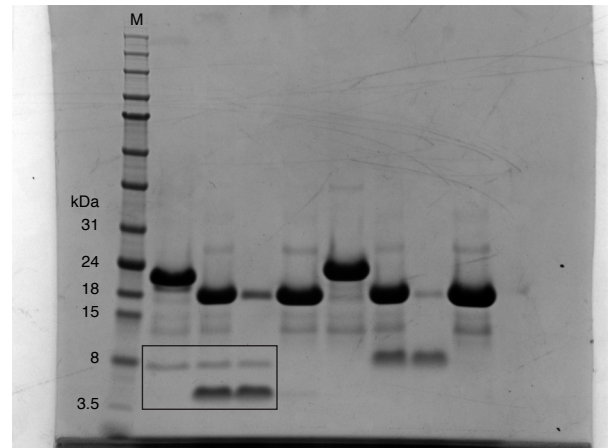

Supplementary Figure 6d

anti-FLAG

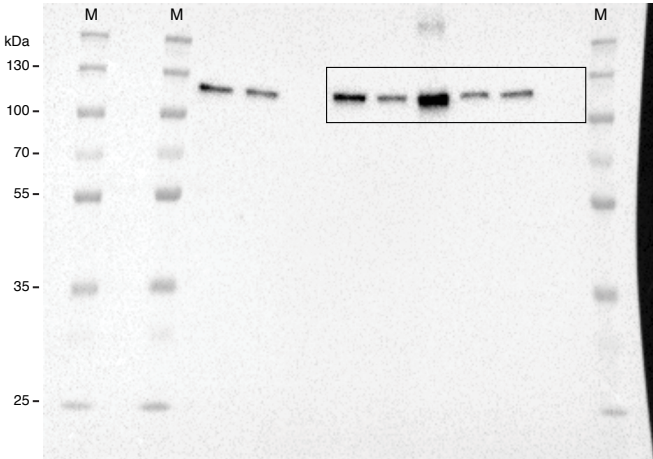

anti-GFP

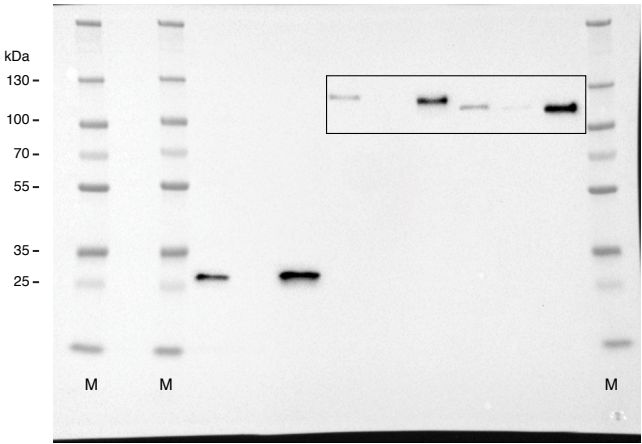



Supplementary Figure 6e

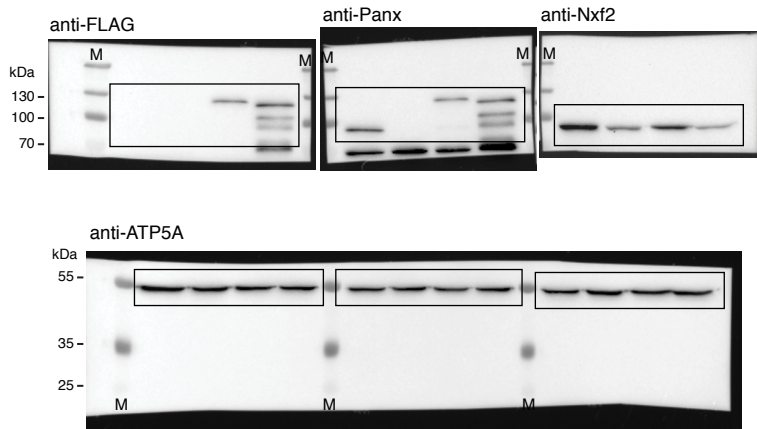

Supplementary Figure 6f

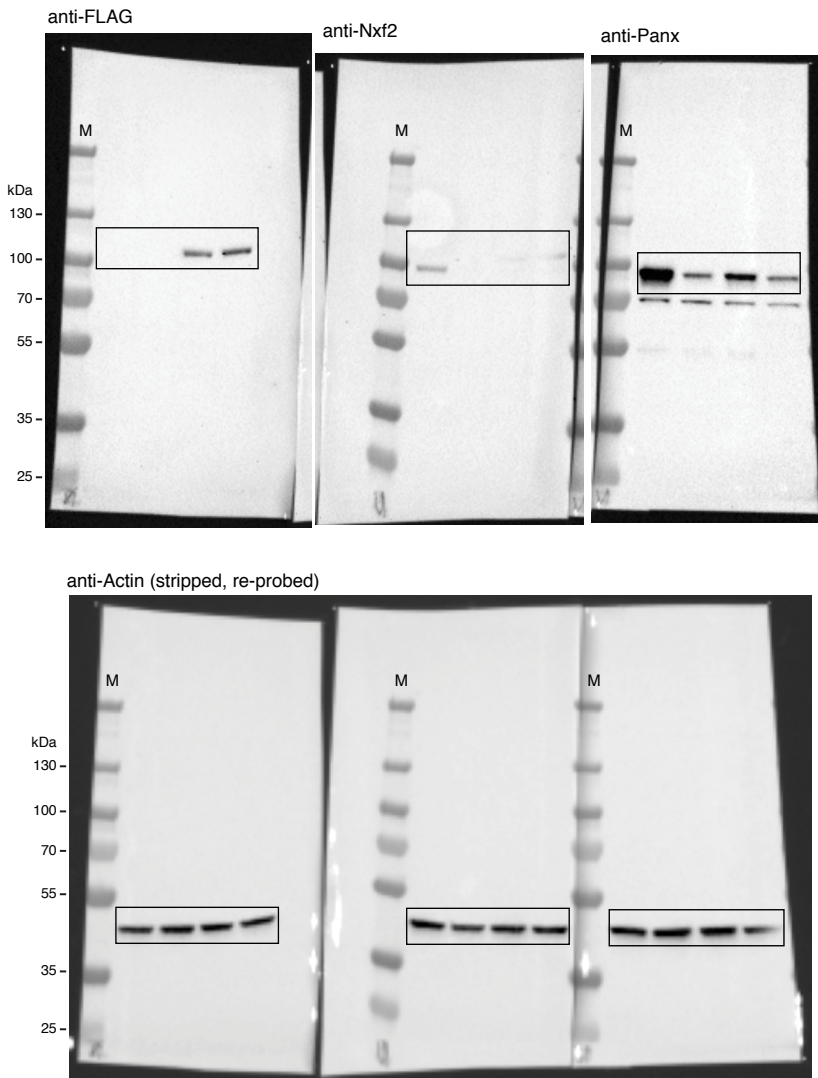

### Supplementary Figure 6g

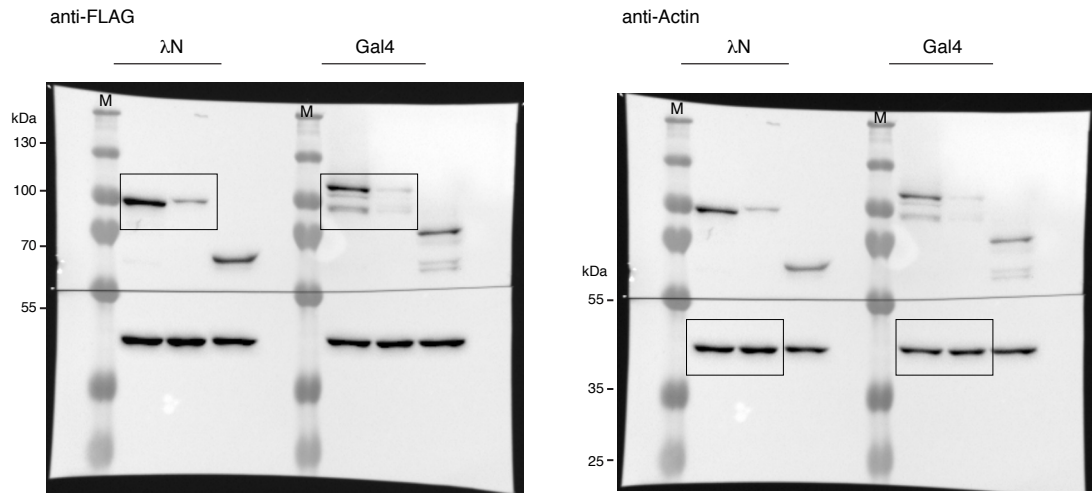

### Supplementary Figure 6h

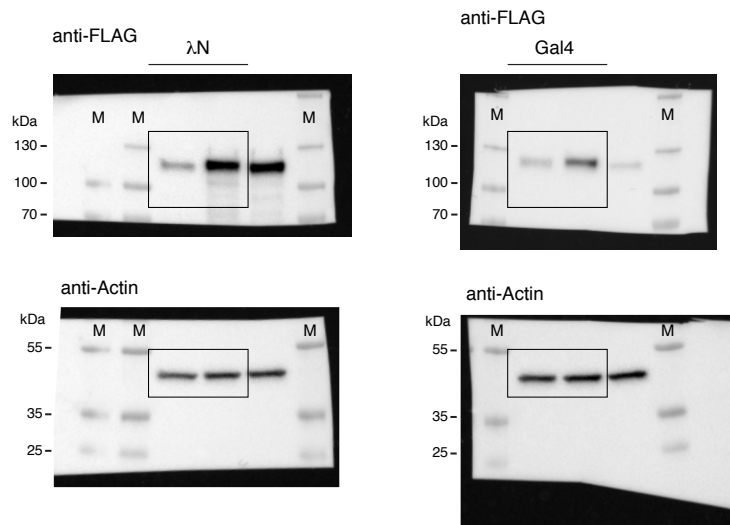

Figure 6e

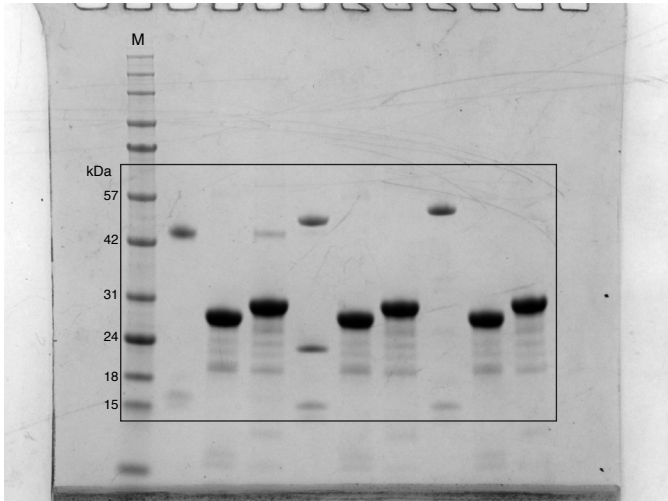

Figure 7a

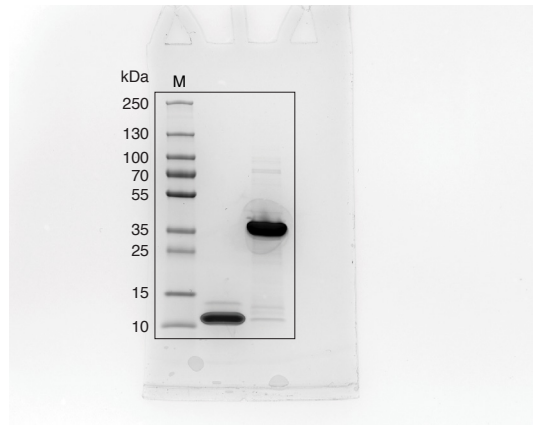

Figure 7b

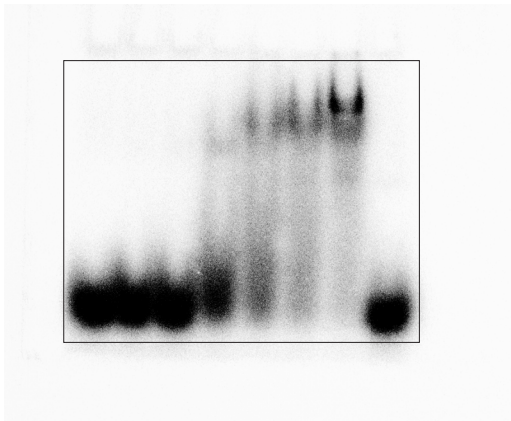

Figure 7c

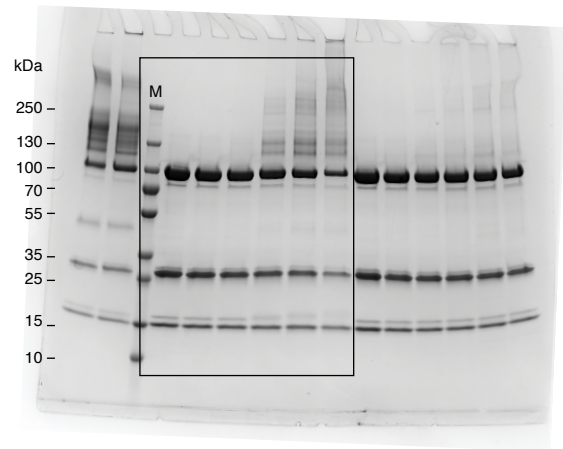

Figure 7e

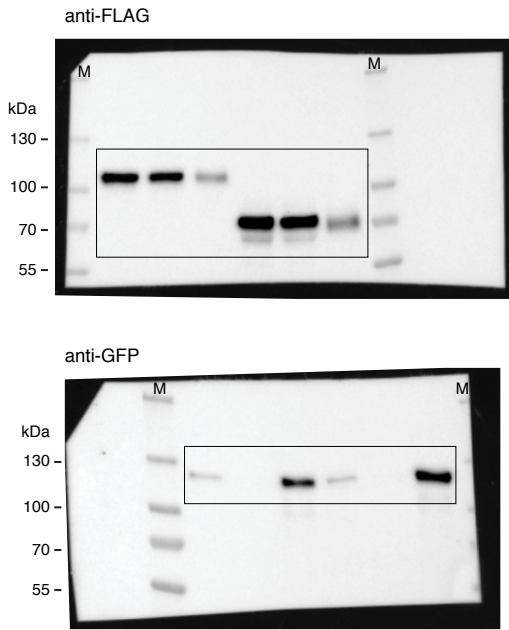

Supplementary Figure 8b

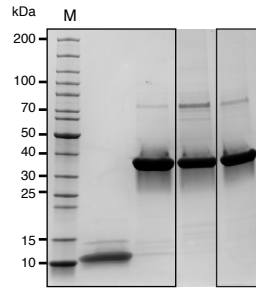

Supplementary Figure 8c

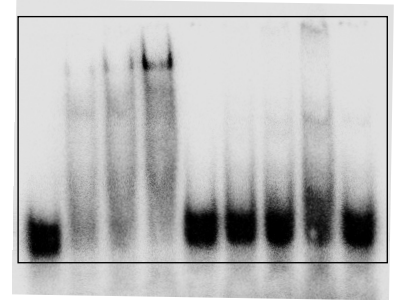

Supplementary Figure 8e

anti-FLAG

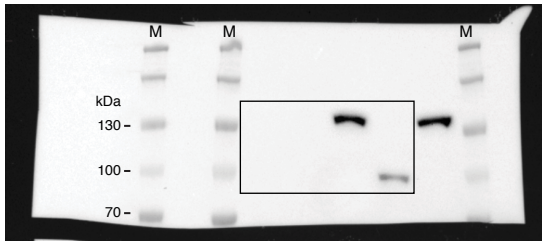

anti-Nxf2

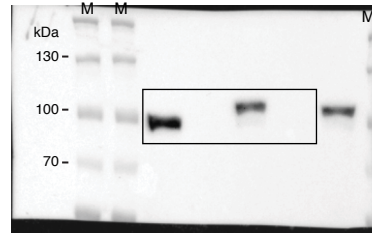

anti-Panx

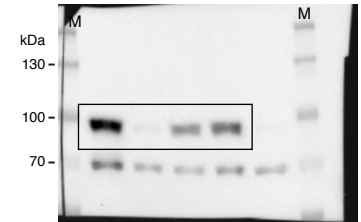

anti-Actin

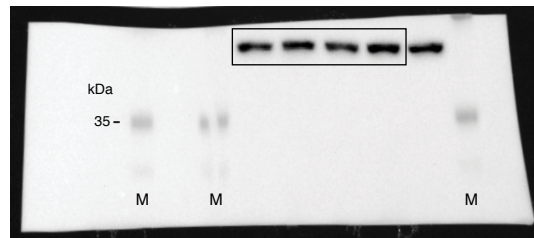

anti-Actin

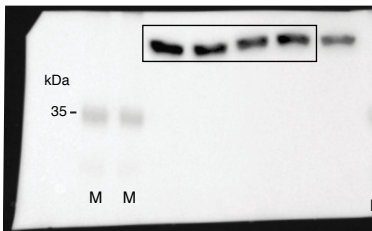

anti-Actin

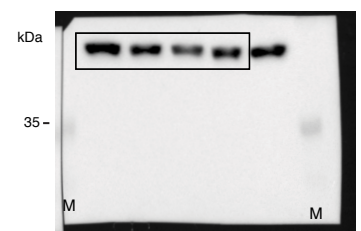

# Supplementary Figure 8f

anti-FLAG

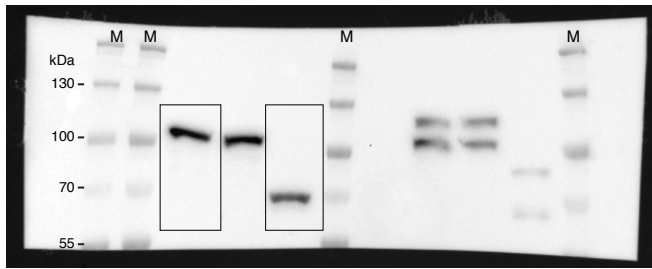

anti-Actin

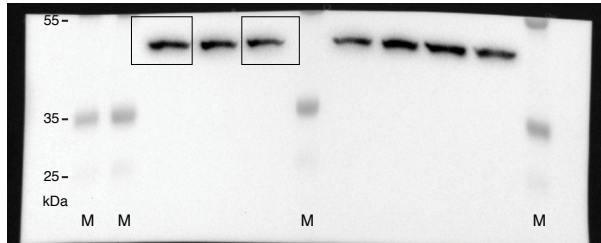

Supplement: NIHMS1532200-supplement-Dateset1.pdf [file NIHMS1532200-supplement-Dateset1.pdf]
