# Supplementary material
Source: PubMed Central journal article supplement (PMC6828549)
Supplement: NIHMS1532200-supplement-7.pdf [file NIHMS1532200-supplement-7.pdf]

## Supplementary Table 6 – Protein sequence accessions for phylogenetic tree and alignments

Note: Protein ID refers to the NCBI GenPept database

| NXF family proteins              |                        |                       |              |              |
|----------------------------------|------------------------|-----------------------|--------------|--------------|
| Species name                     | Species name short     | Species common name   | Protein ID   | Protein name |
| <i>Saccharomyces cerevisiae</i>  | <i>S. cerevisiae</i>   | budding yeast         | NP_015156    | MEX67        |
| <i>Schizosaccharomyces pombe</i> | <i>S. pombe</i>        | fission yeast         | NP_595996    | MEX67        |
| <i>Hydra vulgaris</i>            | <i>H. vulgaris</i>     |                       | XP_002156460 | Nxf1-like    |
| <i>Caenorhabditis elegans</i>    | <i>C. elegans</i>      |                       | NP_001129880 | NXF-1        |
| <i>Caenorhabditis elegans</i>    | <i>C. elegans</i>      |                       | NP_506568    | NXF-2        |
| <i>Danio rerio</i>               | <i>D. rerio</i>        | zebrafish             | XP_001923961 | Nxf1         |
| <i>Danio rerio</i>               | <i>D. rerio</i>        | zebrafish             | XP_009306018 | Nxf2         |
| <i>Mus musculus</i>              | <i>M. musculus</i>     | house mouse           | NP_058093    | Nxf1         |
| <i>Mus musculus</i>              | <i>M. musculus</i>     | house mouse           | NP_112549    | Nxf2         |
| <i>Mus musculus</i>              | <i>M. musculus</i>     | house mouse           | NP_001019312 | Nxf3         |
| <i>Mus musculus</i>              | <i>M. musculus</i>     | house mouse           | NP_570958    | Nxf7         |
| <i>Homo sapiens</i>              | <i>H. sapiens</i>      | human                 | NP_006353    | NXF1         |
| <i>Homo sapiens</i>              | <i>H. sapiens</i>      | human                 | NP_071336    | NXF2         |
| <i>Homo sapiens</i>              | <i>H. sapiens</i>      | human                 | NP_071335    | NXF3         |
| <i>Homo sapiens</i>              | <i>H. sapiens</i>      | human                 | BAC85929     | NXF4         |
| <i>Homo sapiens</i>              | <i>H. sapiens</i>      | human                 | NP_116564    | NXF5         |
| <i>Daphnia pulex</i>             | <i>D. pulex</i>        | common water flea     | EFX66242     | Nxf1-like    |
| <i>Musca domestica</i>           | <i>M. domestica</i>    | house fly             | XP_019893891 | Nxf1-like    |
| <i>Musca domestica</i>           | <i>M. domestica</i>    | house fly             | XP_011294658 | Nxf2-like    |
| <i>Aedes aegypti</i>             | <i>A. aegypti</i>      | yellow fever mosquito | XP_001657723 | Nxf1-like    |
| <i>Aedes aegypti</i>             | <i>A. aegypti</i>      | yellow fever mosquito | XP_001651793 | Nxf2-like    |
| <i>Anopheles gambiae</i>         | <i>A. gambiae</i>      |                       | XP_307993    | Nxf1-like    |
| <i>Anopheles gambiae</i>         | <i>A. gambiae</i>      |                       | XP_321055    | Nxf2-like    |
| <i>Drosophila virilis</i>        | <i>D. virilis</i>      |                       | XP_002055673 | Nxf1         |
| <i>Drosophila virilis</i>        | <i>D. virilis</i>      |                       | XP_002046260 | Nxf2         |
| <i>Drosophila virilis</i>        | <i>D. virilis</i>      |                       | XP_015031802 | Nxf3         |
| <i>Drosophila virilis</i>        | <i>D. virilis</i>      |                       | XP_002056590 | Nxf4         |
| <i>Drosophila melanogaster</i>   | <i>D. melanogaster</i> | fruit fly             | NP_524660    | Nxf1/sbr     |
| <i>Drosophila melanogaster</i>   | <i>D. melanogaster</i> | fruit fly             | NP_524111    | Nxf2         |
| <i>Drosophila melanogaster</i>   | <i>D. melanogaster</i> | fruit fly             | NP_729938    | Nxf3         |
| <i>Drosophila melanogaster</i>   | <i>D. melanogaster</i> | fruit fly             | NP_731156    | Nxf4         |

| <b>Panoramix family proteins</b> |              |                   |                 |
|----------------------------------|--------------|-------------------|-----------------|
| Species name                     | Protein ID   | Alignment - Start | Alignment - End |
| <i>Drosophila melanogaster</i>   | NP_611675    | 308               | 446             |
| <i>Drosophila biarmipes</i>      | XP_016953201 | 318               | 456             |
| <i>Drosophila ananassae</i>      | XP_001959319 | 284               | 422             |
| <i>Drosophila serrata</i>        | XP_020802500 | 289               | 427             |
| <i>Drosophila pseudoobscura</i>  | XP_001360439 | 434               | 572             |
| <i>Drosophila obscura</i>        | XP_022230127 | 408               | 545             |
| <i>Drosophila virilis</i>        | XP_002055052 | 297               | 432             |
| <i>Drosophila mojavensis</i>     | XP_002009600 | 292               | 430             |
| <i>Musca domestica</i>           | XP_005189840 | 396               | 535             |
| <i>Ceratitis capitata</i>        | XP_004524918 | 512               | 649             |
| <i>Aedes aegypti</i>             | XP_021704954 | 396               | 519             |
| <i>Anopheles gambiae</i>         | XP_001688284 | 403               | 534             |
| <i>Aedes aegypti</i>             | XP_021704940 | 492               | 621             |

| <b>Nxf2 family proteins</b>     |              |                   |                 |
|---------------------------------|--------------|-------------------|-----------------|
| Species name                    | Protein ID   | Alignment - Start | Alignment - End |
| <i>Drosophila melanogaster</i>  | NP_524111    | 786               | 841             |
| <i>Drosophila biarmipes</i>     | XP_016966546 | 787               | 842             |
| <i>Drosophila ananassae</i>     | XP_001957658 | 781               | 836             |
| <i>Drosophila serrata</i>       | XP_020800007 | 784               | 839             |
| <i>Drosophila pseudoobscura</i> | XP_002137987 | 799               | 854             |
| <i>Drosophila obscura</i>       | XP_022227270 | 798               | 853             |
| <i>Drosophila virilis</i>       | XP_002046260 | 784               | 840             |
| <i>Drosophila mojavensis</i>    | XP_002012228 | 786               | 842             |
| <i>Musca domestica</i>          | XP_011294658 | 796               | 851             |
| <i>Ceratitis capitata</i>       | XP_004526254 | 792               | 847             |
| <i>Aedes aegypti</i>            | XP_001651793 | 869               | 931             |
| <i>Anopheles gambiae</i>        | XP_321055    | 855               | 914             |

| <b>Nxf1 family proteins</b>     |              |                   |                 |
|---------------------------------|--------------|-------------------|-----------------|
| Species name                    | Protein ID   | Alignment - Start | Alignment - End |
| <i>Drosophila melanogaster</i>  | NP_52466     | 616               | 672             |
| <i>Drosophila biarmipes</i>     | XP_016951832 | 632               | 688             |
| <i>Drosophila ananassae</i>     | XP_001963487 | 625               | 681             |
| <i>Drosophila serrata</i>       | XP_020805502 | 608               | 664             |
| <i>Drosophila pseudoobscura</i> | XP_001355396 | 630               | 686             |
| <i>Drosophila obscura</i>       | XP_022227481 | 638               | 694             |
| <i>Drosophila virilis</i>       | XP_002055673 | 617               | 673             |
| <i>Drosophila mojavensis</i>    | XP_015017053 | 619               | 675             |
| <i>Musca domestica</i>          | XP_019893891 | 605               | 661             |
| <i>Ceratitis capitata</i>       | XP_004531112 | 585               | 641             |
| <i>Aedes aegypti</i>            | XP_001657723 | 596               | 653             |
| <i>Anopheles gambiae</i>        | XP_307993    | 604               | 661             |

**Supplementary Table 7 – Fly strains**

| Category           | Genotype                                                 | Gene name | Synonyms               | CG_Number | Source                    |
|--------------------|----------------------------------------------------------|-----------|------------------------|-----------|---------------------------|
| control stock      | w[1118]; ;                                               | w         | white                  | CG2759    | Andersen et al., 2017     |
| mutant allele      | w; ;nxf2 $\Delta$ _MA4-6/TM3, Sb                         | Nxf2      |                        | CG4118    | This paper                |
| mutant allele      | w; ;nxf2 $\Delta$ _MB1-4/TM3, Sb                         | Nxf2      |                        | CG4118    | This paper                |
| mutant allele      | w;panx $\Delta$ _1-m3-4/CyO; ;                           | Panx      | Silencio               | CG9754    | Sienski et al., 2015      |
| mutant allele      | w;panx $\Delta$ _2-m1-9/CyO; ;                           | Panx      | Silencio               | CG9754    | Sienski et al., 2015      |
| mutant allele      | w;piwi $\Delta$ _1m1-1/CyO; ;                            | Piwi      |                        | CG6122    | Senti et al., 2015        |
| mutant allele      | w;piwi $\Delta$ _2m4-1/CyO; ;                            | Piwi      |                        | CG6122    | Senti et al., 2015        |
| endogenous tagging | w; ;FLAG-GFP-Nxf2;                                       | Nxf2      |                        | CG4118    | This paper                |
| endogenous tagging | w;FLAG-GFP-Panx; ;                                       | Panx      | Silencio               | CG9754    | This paper                |
| RNAi line          | w; ; pW20>w_sh[attP2]/TM3, Sb                            | w         | white                  | CG2759    | Mohn <i>et al.</i> , 2014 |
| RNAi line          | w; ; pW20>nxf2_sh_1[attP2]/TM3, Sb                       | Nxf2      |                        | CG4118    | This paper                |
| RNAi line          | w; ; pW20>nxf2_sh_2[attP2]/TM3, Sb                       | Nxf2      |                        | CG4118    | This paper                |
| RNAi line          | w; ; pW20>panx_sh[attP2]/TM3, Sb                         | Panx      | Silencio               | CG9754    | Sienski et al., 2015      |
| RNAi line          | w; ; pW20>piwi_sh[attP2]/TM3, Sb                         | Piwi      |                        | CG6122    | Senti et al., 2015        |
| RNAi line          | w; ; pW20>nxf1_sh[attP2]/TM3, Sb                         | Nxf1      | sbr                    | CG1664    | Handler et al. 2013       |
| Tagged construct   | MTD; MTD/CyO; MTD, FLAG-V5-GFP-Nxf2 [attP2]/TM3,Sb       | Nxf2      |                        | CG4118    | This paper                |
| Tagged construct   | MTD; MTD/CyO; MTD,Panx- FLAG-V5-GFP [attP2]/TM3,Sb       | Panx      | Silencio               | CG9754    | This paper                |
| GAL4 driver        | MTD-Gal4                                                 |           | maternal triple driver |           | Bloomington 31777         |
| GAL4 driver        | tj-Gal4                                                  |           |                        |           |                           |
| Rescue construct   | w;;nxf2 $\Delta$ _MA4-6, GFP-nxf2[wt]/TM3,Sb             | Nxf2      |                        | CG4118    | This paper                |
| Rescue construct   | w;;nxf2 $\Delta$ _MA4-6, GFP-nxf2[delta 1st unit]/TM3,Sb | Nxf2      |                        | CG4118    | This paper                |

**Supplementary Table 8 – Oligos**

| Purpose                                                                                          | Oligo Name                | Sequence                                                                        |
|--------------------------------------------------------------------------------------------------|---------------------------|---------------------------------------------------------------------------------|
| Cloning oligos for fly guide RNA expression plasmids with genome matching sequence underlined    | Nxf2-KO_gRNA_1_fw         | cttcgATCGTGTTCGGGTACCCAT                                                        |
|                                                                                                  | Nxf2-KO_gRNA_1_re         | aaacATGGGTACCCGGAACACGATc                                                       |
|                                                                                                  | Nxf2-KO_gRNA_2_fw         | cttcgCCTGGAATACTCGCCAAATC                                                       |
|                                                                                                  | Nxf2-KO_gRNA_2_re         | aaacGATTTGGCGAGTATTCCAGGc                                                       |
|                                                                                                  | Nxf2-TAG-N_gRNA_fw        | cttcgCAAAGTCCAGCACTCTCATC                                                       |
|                                                                                                  | Nxf2-TAG-N_gRNA_re        | aaacGATGAGAGTGCTGGACTTTGc                                                       |
|                                                                                                  | Panx-TAG-N_gRNA_fw        | cttcgACTTTGACCTCTAGCTTCAT                                                       |
| Panx-TAG-N_gRNA_re                                                                               | aaacATGAAGCTAGAGGTCAAAGTc |                                                                                 |
| Cloning oligos for short-hairpin (sh) RNA expression plasmid                                     | Nxf2_sh_fw                | TAGCAGTCTGGTACTTCACGGAAA<br>TAAATAGTTATATTCAAGCATATTT<br>ATTTCCGTGAAGTACCAGGCG  |
|                                                                                                  | Nxf2_sh_re                | AATTCGCCTGGTACTTCACGGAAA<br>TAAATATGCTTGAATATAACTATTT<br>ATTTCCGTGAAGTACCAGACTG |
| Cloning oligos for OSC/S2 guide RNA expression plasmids with genome matching sequence underlined | chr2L:9,094,918_gRNA_1_fw | ttcgTGCCACATGCAACGCGGAGT                                                        |
|                                                                                                  | chr2L:9,094,918_gRNA_1_re | aacACTCCGCGTTGCATGTGGCAc                                                        |
|                                                                                                  | chr2L:9,094,918_gRNA_2_fw | ttcgGCGGAGTTGGAGTTTTGTAT                                                        |
|                                                                                                  | chr2L:9,094,918_gRNA_2_re | aacATACAAAACCTCCAACCTCCGCc                                                      |
|                                                                                                  | chr2L:9,103,945_gRNA_1_fw | ttcgTTTAAGACATTAAGTATACG                                                        |
|                                                                                                  | chr2L:9,103,945_gRNA_1_re | aacCGTATACTTAATGTCTTAAAc                                                        |
|                                                                                                  | chr2L:9,103,945_gRNA_2_fw | ttcgTTATTGCCGCCCTAAAGACG                                                        |
| chr2L:9,103,945_gRNA_2_re                                                                        | aacCGTCTTTAGGGCGGCAATAAc  |                                                                                 |
| Oligos used for droplet PCR                                                                      | nanos_fw                  | GCAACTTAATGCCCATTCAC                                                            |
|                                                                                                  | nanos_re                  | CGGCTGGTATATACGACATGT                                                           |
|                                                                                                  | rep_GFP_fw                | ACGACGGCAACTACAAGACC                                                            |
|                                                                                                  | rep_GFP_re                | TCCTCCTTGAAGTCGATGCC                                                            |
|                                                                                                  | rep_Bla_fw                | AAGCCTACATTGGCAGGGTC                                                            |
| rep_Bla_re                                                                                       | CATCACTGTAGGGGTGCCTC      |                                                                                 |
| Oligos used for RT-qPCR                                                                          | Rrp49_mRNA_fw             | CCGCTTCAAGGGACAGTATCTG                                                          |
|                                                                                                  | Rrp49_mRNA_re             | ATCTCGCCGCAGTAAACGC                                                             |
|                                                                                                  | mdg1_RNA-fw               | ATATGTGCGACAAATTCGTCCAC                                                         |
|                                                                                                  | mdg1_RNA-re               | CAAGTATCTTTGTCTTGATTACCTCAAC                                                    |
| Oligos used for ChIP-qPCR                                                                        | kalahari_fw               | TGGTCTACGACATGGGCAAC                                                            |
|                                                                                                  | kalahari_re               | TGGGAATCGTCAGGGGTATC                                                            |
|                                                                                                  | gobi_fw                   | ATCGTCGGCTTCGTTAGAGG                                                            |
|                                                                                                  | gobi_re                   | ACACACGGACATACGCGAAC                                                            |
|                                                                                                  | light_fw                  | ATGCGGCGGTATAACTGAAC                                                            |
|                                                                                                  | light_re                  | TGGAGATCCGAAAGTCAAGC                                                            |
|                                                                                                  | btk29_peak_fw             | GAAGACGGACAGACTGAAGAGTG                                                         |
|                                                                                                  | btk29_peak_re             | TCCTATACATTTTCGCTGGTTTTTC                                                       |
|                                                                                                  | act42_TSS_fw              | AAAAGAACGCAGACGGGACC                                                            |
|                                                                                                  | act42_TSS_re              | AGGCGTCGGTCAATTCAATCT                                                           |
|                                                                                                  | gapdh1_TSS_fw             | TCCGTTAATTCCGATCTTCGACA                                                         |
|                                                                                                  | gapdh1_TSS_re             | AAAAAGCGGCAGTCGTAATAGC                                                          |
|                                                                                                  | GFP_rep_int_1_fw          | GCCACCATGGAAAAGGTAGG                                                            |
|                                                                                                  | GFP_rep_int_1_re          | TAGGAATGGGTGACCTCGAG                                                            |
|                                                                                                  | GFP_rep_int_2_fw          | TCACCCATTCTAGCTTCCC                                                             |
|                                                                                                  | GFP_rep_int_2_re          | GCTCACCATGGCCTGAAG                                                              |
|                                                                                                  | GFP_fw                    | CCCGACAACCACTACCTGAG                                                            |
| GFP_re                                                                                           | GTCCATGCCGAGAGTGATCC      |                                                                                 |

**Supplementary Table 9 – siRNAs**

| <b>Target gene</b> | <b>Sequence</b>        |
|--------------------|------------------------|
| GFP_guide          | ACUUCAGGGUCAGCUUGCCUU  |
| GFP_passenger      | GGCAAGCUGACCCUGAAGUUU  |
| luc_guide          | UUCAGUAUUAGGAAACUUCUU  |
| luc_passenger      | GAAGUUUCCUAAUACUGAAUU  |
| piwi_guide         | CACCUUCACGCCUGGGAGCUU  |
| piwi_passenger     | GCUCCCAGGCGUGAAGGUGUU  |
| Panx_guide         | UUCUUGUACAGCGUAGCCGUU  |
| Panx_passenger     | CGGCUACGCUGUACAAGAAUU  |
| Nxf2_1_guide       | CCGAAUGC UUAACCUCGAAUU |
| Nxf2_1_passenger   | UUCGAGGUUAAGCAUUCGGUU  |
| Nxf2_2_guide       | CGGAGGAGUGCAUACAGAAUU  |
| Nxf2_2_passenger   | UUCUGUAUGCACUCCUCCGUU  |

**Supplementary Table 10 – Antibodies**

| <b>Antibody</b>                                                               | <b>Source</b>            | <b>Identifier</b> | <b>Experiment</b>                         |
|-------------------------------------------------------------------------------|--------------------------|-------------------|-------------------------------------------|
| GFP-Trap_MA Magnetic Beads                                                    | ChromoTek                | Cat# gtma-20      | co-immunoprecipitation                    |
| Anti-FLAG M2 Magnetic Beads                                                   | Sigma Aldrich            | Cat# M8823-1ML    | co-immunoprecipitation                    |
| Anti-Actin antibody produced in rabbit                                        | Sigma Aldrich            | Cat# A2066-2ML    | western blot loading control 1:8000       |
| Anti-ATP5A antibody [15H4C4] produced in mouse                                | Abcam                    | Cat# ab14748      | western blot loading control 1:8000       |
| Anti-GFP Living Colors A.v. Monoclonal Antibody (JL-8) produced in mouse      | Takara                   | Cat# 632381       | western blot 1:1000                       |
| Monoclonal ANTI-FLAG M2 antibody produced in mouse                            | Sigma Aldrich            | Cat# F3165-.2MG   | western blot 1:1000                       |
| anti-RNA Polymerase II, 8WG16                                                 | Abcam                    | Cat# ab817        | chromatin immunoprecipitation             |
| anti-H3K9me3 antibody produced in rabbit                                      | Active Motif             | Cat# 39161        | chromatin immunoprecipitation             |
| Anti-Nxf2 monoclonal antibody produced in mouse                               | This paper               | A86               | immunofluorescence staining 1:50          |
| Anti-Panx monoclonal antibody produced in mouse                               | This paper               | 1B1               | immunofluorescence staining 1:200         |
| Anti-Nxf2 monoclonal antibody produced in mouse                               | This paper               | 3D5-G10           | western blot 1:10                         |
| Anti-Panx monoclonal antibody produced in mouse                               | Sienski et al., 2015     | 2B4-H11           | western blot 1:20, co-immunoprecipitation |
| Anti-Piwi monoclonal antibody produced in mouse                               | Senti et al., 2015       | 8C2-E4            | western blot 1:1000                       |
| Anti-Piwi antibody produced in rabbit                                         | Brennecke et al., 2007   | A12               | immunofluorescence staining 1:1000        |
| Anti-Mouse IgG (whole molecule)–Peroxidase antibody produced in rabbit        | Sigma Aldrich            | Cat# A9044-2ML    | western blot 1:8000                       |
| Anti-Rabbit IgG (whole molecule)–Peroxidase antibody produced in goat         | Sigma Aldrich            | Cat# A0545-1ML    | western blot 1:8000                       |
| Goat anti-Rabbit IgG (H+L) Cross-Adsorbed Secondary Antibody, Alexa Fluor 568 | Thermo Fisher Scientific | Cat# A-11011      | immunofluorescence staining 1:1000        |
| Goat anti-Mouse IgG (H+L) Cross-Adsorbed Secondary Antibody, Alexa Fluor 647  | Thermo Fisher Scientific | Cat# A-21235      | immunofluorescence staining 1:1000        |
| Wheat Germ Agglutinin, Alexa Fluor 647 Conjugate                              | Thermo Fisher Scientific | Cat# W32466       | immunofluorescence staining 1:200         |
| Anti-GFP antibody (rabbit)                                                    | Abcam                    | ab6556            | immunofluorescence staining 1:2000        |

**Supplementary Table 11** – Stellaris oligo probes detecting mdg1 RNA

| Oligo number | Sequence             |
|--------------|----------------------|
| 1            | ttgtatttcttgccagtcca |
| 2            | ctctatttgggtcatgcat  |
| 3            | ttgagagtgtcttgttgac  |
| 4            | ttaccaatatctgcgcatgc |
| 5            | ttaattggcgtgctccatta |
| 6            | tctcacggaacctgtttaga |
| 7            | gttgtgtctgtacttgacgt |
| 8            | atctcagccactatagggtg |
| 9            | atcgtggagatccttctt   |
| 10           | ttattaccgctggaattgca |
| 11           | cttctcaagtaattcgggt  |
| 12           | tcctgtattgaaatcgaaa  |
| 13           | tgtccgttctctgtattctt |
| 14           | gttgccgcagagtctgtcat |
| 15           | ttgtcgcacatattcccttg |
| 16           | actcaggtattgtggacgaa |
| 17           | aagtttaacttttgcgctc  |
| 18           | gagagccgtgaggaatctat |
| 19           | cctgatctcctttgtcaga  |
| 20           | gattacctcaaccgtagca  |
| 21           | atggaccaagatctttgtc  |
| 22           | tcattttcaacttgtgtga  |
| 23           | tattataccgataatggctt |
| 24           | tcgcctttaactgatgcttt |
| 25           | tttgcttgatgacatcggg  |
| 26           | gcgctgttgtgactaagca  |
| 27           | acgtaggtttctatctccg  |
| 28           | tatataggctgcttcgagca |
| 29           | tgttggatctaaacctca   |
| 30           | ttttagcgaattgtctgc   |
| 31           | ggtcattgcagatagggctt |
| 32           | gcttatcgtgccacagttc  |
| 33           | ttccagcttccaatatgg   |
| 34           | cacgctattcatcgtgtga  |
| 35           | gtgcctctattattataga  |
| 36           | ctcggtaattattacctga  |
| 37           | ttacctgttttggtaatt   |
| 38           | ggagttataattcctcggc  |
| 39           | acctctgcctctatagttg  |
| 40           | ctctgtttccaccatggtaa |
| 41           | tggtttggttacctctga   |
| 42           | cattgtggcatgactgtt   |
| 43           | tgttcgtttccgattgtat  |
| 44           | tttagattgcgctcaagg   |
| 45           | acctgaattggtactcat   |
| 46           | attgttctgcatttaagca  |
| 47           | gaattgtccctgacctatt  |
| 48           | tttctaaatgtagtgacct  |

**Supplementary Table 12 – NGS list (GEO Accession: GSE120617)**

| NGS ID   | Name                            | Experiment | Description                                            |
|----------|---------------------------------|------------|--------------------------------------------------------|
| NGS51151 | w1118_rRNA dep_RNAseq           | RNA-seq    | rRNA depleted total RNAs from ovaries                  |
| NGS51152 | Piwi_KO_TH_rRNA dep_RNAseq      |            |                                                        |
| NGS51157 | Panx_KO_TH_rRNA dep_RNAseq      |            |                                                        |
| NGS51153 | Nxf2_KO_g1_rRNA dep_RNAseq      |            |                                                        |
| NGS51154 | Nxf2_KO_g2_rRNA dep_RNAseq      |            |                                                        |
| NGS51155 | Nxf2_KO_TH_rRNA dep_RNAseq      |            |                                                        |
| NGS50789 | w_GLKD_rRNA dep_RNAseq          | RNA-seq    | rRNA depleted total RNAs from ovaries                  |
| NGS50790 | Piwi_GLKD_rRNA dep_RNAseq       |            |                                                        |
| NGS50791 | Panx_GLKD_rRNA dep_RNAseq       |            |                                                        |
| NGS50792 | Nxf2_GLKD_rRNA dep_RNAseq       |            |                                                        |
| NGS48737 | ctrl_OSC KD_rRNA dep_RNAseq     | RNA-seq    | rRNA depleted total RNAs from OSCs                     |
| NGS48738 | Piwi_OSC KD_rRNA dep_RNAseq     |            |                                                        |
| NGS48739 | Panx_OSC KD_rRNA dep_RNAseq     |            |                                                        |
| NGS48742 | Nxf2_1_OSC KD_rRNA dep_RNAseq   |            |                                                        |
| NGS48743 | Nxf2_2_OSC KD_rRNA dep_RNAseq   |            |                                                        |
| NGS66681 | ctrl_OSC KD_polyA_RNAseq-rep1   | RNA-seq    | polyA selected RNAs from OSCs                          |
| NGS66688 | ctrl_OSC KD_polyA_RNAseq-rep2   |            |                                                        |
| NGS66695 | ctrl_OSC KD_polyA_RNAseq-rep3   |            |                                                        |
| NGS66682 | Piwi_OSC KD_polyA_RNAseq-rep1   |            |                                                        |
| NGS66689 | Piwi_OSC KD_polyA_RNAseq-rep2   |            |                                                        |
| NGS66696 | Piwi_OSC KD_polyA_RNAseq-rep3   |            |                                                        |
| NGS66683 | Panx_OSC KD_polyA_RNAseq-rep1   |            |                                                        |
| NGS66690 | Panx_OSC KD_polyA_RNAseq-rep2   |            |                                                        |
| NGS66697 | Panx_OSC KD_polyA_RNAseq-rep3   |            |                                                        |
| NGS66685 | Nxf2_1_OSC KD_polyA_RNAseq-rep1 |            |                                                        |
| NGS66692 | Nxf2_1_OSC KD_polyA_RNAseq-rep2 |            |                                                        |
| NGS66699 | Nxf2_1_OSC KD_polyA_RNAseq-rep3 |            |                                                        |
| NGS66686 | Nxf2_2_OSC KD_polyA_RNAseq-rep1 |            |                                                        |
| NGS66693 | Nxf2_2_OSC KD_polyA_RNAseq-rep2 |            |                                                        |
| MGS66700 | Nxf2_2_OSC KD_polyA_RNAseq-rep3 |            |                                                        |
| NGS51342 | w_GLKD_sRNAseq                  |            |                                                        |
| NGS51343 | Piwi_GLKD_sRNAseq               |            |                                                        |
| NGS51344 | Panx_GLKD_sRNAseq               |            |                                                        |
| NGS51345 | Nxf2_GLKD_sRNAseq               |            |                                                        |
| NGS49844 | ctrl_OSC KD_sRNAseq             | sRNA-seq   | small RNAs (18-29 nt) from OSCs with 2S rRNA depletion |
| NGS49845 | Piwi_OSC KD_sRNAseq             |            |                                                        |
| NGS49846 | Panx_OSC KD_sRNAseq             |            |                                                        |
| NGS49847 | Nxf2_1_OSC KD_sRNAseq           |            |                                                        |
| NGS49848 | Nxf2_2_OSC KD_sRNAseq           |            |                                                        |



| NGS ID   | Name                       | Experiment | Description                                              |
|----------|----------------------------|------------|----------------------------------------------------------|
| NGS66728 | ctrl_OSC KD_ChIP_inp       | ChIP-seq   | input DNA used for chromatin immunoprecipitation in OSCs |
| NGS66729 | Piwi_OSC KD_ChIP_inp       |            |                                                          |
| NGS66730 | Panx_OSC KD_ChIP_inp       |            |                                                          |
| NGS66732 | Nxf2_1_OSC KD_ChIP_inp     |            |                                                          |
| NGS66733 | Nxf2_2_OSC KD_ChIP_inp     |            |                                                          |
| NGS66734 | ctrl_OSC KD_ChIP_H3K9me3   | ChIP-seq   | chromatin immunoprecipitation with H3K9me3 in OSCs       |
| NGS66735 | Piwi_OSC KD_ChIP_H3K9me3   |            |                                                          |
| NGS66736 | Panx_OSC KD_ChIP_H3K9me3   |            |                                                          |
| NGS66738 | Nxf2_1_OSC KD_ChIP_H3K9me3 |            |                                                          |
| NGS66739 | Nxf2_2_OSC KD_ChIP_H3K9me3 |            |                                                          |
| NGS66740 | ctrl_OSC KD_ChIP_Pol II    | ChIP-seq   | chromatin immunoprecipitation with RNA Pol II in OSCs    |
| NGS66741 | Piwi_OSC KD_ChIP_Pol II    |            |                                                          |
| NGS66742 | Panx_OSC KD_ChIP_Pol II    |            |                                                          |
| NGS66744 | Nxf2_1_OSC KD_ChIP_Pol II  |            |                                                          |
| NGS66745 | Nxf2_2_OSC KD_ChIP_Pol II  |            |                                                          |

**Supplementary Table 13 – Antisense rRNA oligo list**

| Oligo Name | Sequence                                             |
|------------|------------------------------------------------------|
| ITS2-251   | GTTTTTATTTATCCATTTTTAACGAACCAACGAAGAATAATAACATAACC   |
| ITS2-201   | AAGATTTTTCTATTTCCGAATCATTAAATAAGAGACAATTCTAGATGAAAA  |
| ITS2-151   | ATATTTCAATTTTTATGCTAGACATTTCTCAGTATTATTTGATTGAAAA    |
| ITS2-101   | AGAAAATATTTCTCTTCGTTTTTCACATTCAAATGTGAGATAATGTTTT    |
| ITS2-51    | CATTTATTTTTAATATTATGAATAAAAATTATTATTTATCCAATAAT      |
| ITS2-1     | ATACCATATGCTTATAAAAAATTATAAGCAACTTAATTAGCATAGTCTTA   |
| ITS1-651   | TGCAATTATGTTTTATTGAAAGAAATTA AAAATACACCATTTTACTGG    |
| ITS1-601   | CATATATCAATTCCCTCAATAAATGTATTTATATACCTAAAAATAAATGTT  |
| ITS1-551   | GCGAAATGCTTAGTTTTCATATAAGCATTATGTATCATAATAATCTGGTT   |
| ITS1-501   | GGTTATGGGGTTTGCTATTTTGGGTGACACATACTGCAATTTATATAAAA   |
| ITS1-451   | CATTAACCTGATGGATGCCAGGTACAACATTGTTTATTTTCAGGTTGTTGC  |
| ITS1-401   | ATTAGCCAACGTATGCCATAACTAAGATGAACAATACATATTCGCAACG    |
| ITS1-351   | CGTGTATAGTAATAAATACACACAAATTTTAAAAATTAGTTAATATCTAC   |
| ITS1-301   | CAATTATATTAACACTTATTTTCGATGATTACCACACATTCGAAATTTT    |
| ITS1-251   | TATTTTGATTTCGACTTCCACTTTCGAATTTTGTTCTTCGATTTTCATGT   |
| ITS1-201   | TCGAAACATTATTTTTATAGGAAACGCCGTTGTTGTAAGTACTCGCCACA   |
| ITS1-151   | AATACGCACAACATACATTAGAAATGTTAAAATCTTTTTATGAGGTTGCC   |
| ITS1-101   | AAGCCCCACACTAACTATATAAATAAAAACCCATCTTCGTTTTATTTGAT   |
| ITS1-51    | TTAACTTTTGATTCCATGGAATCATTTTGTTATATTTTTATTTTGTTAA    |
| ITS1-1     | ATTGTTTTTATTTGTATAATTACAAATATTTATTAACGGTAAGGATATTA   |
| us18s-801  | AATGTTTTCTTTTCATATTTCCATTCATATTTTTTTGAATTGAAATAAGCAA |
| us18s-751  | TATAAATATTATAGATTTTCCACTTTATATATAATTCCATTTTTTTATAT   |
| us18s-701  | TATTGAATGTAATTCAATATTTTGCCTTTGGGTAAAAATTTTAAATATAT   |
| us18s-651  | TTATAAAAATAAATCCATTTCGAATACGGCCATTTTTATATAGCACTCGTA  |
| us18s-601  | ATTCGTATTCCATTTTTAAATTCTACTTGTTTTACCAATATAACAAGAA    |
| us18s-551  | GATCATACAATTATTGTAATATATTTTCTATAATTTTGTCTTTATATATA   |
| us18s-501  | CATATATTTCAATCTAAAATATCATTATTTTCCAACATACATAAATTTT    |
| us18s-451  | GTATCCACACTTGTACAATTTTGTAAACCAAATAAAGTTAAATCATT      |
| us18s-401  | TGCATCTTGATGATAAATTTAAATTTATCTCTTTTCATATAACTCTCTG    |
| us18s-351  | GTAATATATAACATAAAAACCGAGCGCACATGATAATTCCTCCAAATTTAT  |
| us18s-301  | ATATAAATTTTATATTTCTTTTCATATAATAATATGAATCCATTTTGTATT  |
| us18s-251  | ATACCGTAACGATATAAATAATCCAACCTTACAGGCAGGTAATAAACTAAT  |
| us18s-201  | ATTTGCCTGCCACCAAAAATTAACGATAATATATGGAAACGATTTGTTAT   |
| us18s-151  | TCTATGTATAATAGAACTTGACTTTTTGTTTCAACGATATTATCTAAAAT   |
| us18s-101  | AGCGTATATTCCTATTATCCGCGGAGCCAAGTCCCGTTCAAAAAGAAC     |
| us18s-51   | TGAGAAACAAATTTGTACGGATAATAATATACTTTATTATAAGTAACCAA   |

| Oligo Name | Sequence                                             |
|------------|------------------------------------------------------|
| lrRNA-851  | GCTTATCCCATAAAACATTAATAATTATAAATTAATTAATTAATAATAATAA |
| lrRNA-801  | AAGCATATATTTATTAAATCTATTTAATATTTTTAAAAATTTATTTTATA   |
| lrRNA-751  | TTTAATTTATAAAATAAATTATAACATATTTTTTAATAATTGCTAATTCT   |
| lrRNA-701  | TTAATAATTAAAAACTAACATTTTAATAAATAATTAATAATTTAATAAATAA |
| lrRNA-651  | AAATTAATTTTAACATTATTATATACTAATTTTATCATTATTACTTTAATT  |
| lrRNA-601  | AAACAGGCGAATATTATTTTTGCCGAATTCCTTTATTTAAACTTTTCATAT  |
| lrRNA-551  | CAGTGGGCAGGTTAGACTTTTATATAAATTCAAAAAGACATGTTTTTGTT   |
| lrRNA-501  | TGATTATGCTACCTTTGCACAGTCAAATACTGCGGCCATTTAAAAATTTT   |
| lrRNA-451  | AGTTAATATTTTCGTCCAACCATTCCAGCCTTCAATTAAGACTAA        |
| lrRNA-401  | TTTAGCTTTTTGACTAAAAAATAAAATTTCTATAAAAAATTTAAATGAAAC  |
| lrRNA-351  | ATAAAAAAAAAATATAAAGATTTATAGGGTCTTCTCGTCTTTTAAATAAAT  |
| lrRNA-301  | CCAATAAAATATTTTTATTTATTAATAATTAATTAATCTATATAATTAATAA |
| lrRNA-251  | TAAATTTATGTTTTTAAAAAATTAAGTTTTTTAAATTTAATATCACC      |
| lrRNA-201  | TCCCTAAAGTAACTTAATTTTTAATCATTATTAATGGATCAAAATTTCA    |
| lrRNA-151  | GTCGCAATCTTTTTTATCGATATGAACCTCTCCAAAAAATTACGCTGTTA   |
| lrRNA-101  | TTAAAAATTTGAACGGCTACACCCAAAATTATATCTTAATCCAACATCGAG  |
| lrRNA-51   | TTACACCGGTTTGAACCTCAGATCATGTAAGAATTTAAAAGTCGAACAGAC  |
| lrRNA-1    | CCTTTCGTAATAAATATCATAATTTTTTAAAGATAGAAACCAACCTGGC    |
| srRNA-451  | ATAAATTTAATTTAATTAATAACTAAAAAATTTATTTGTATTAATGGTAT   |
| srRNA-401  | ATAATTTAAATATAAAATTTCACTTAATATATTTAATTTTATTATTATTA   |
| srRNA-351  | AATCCTAGTTTTTTATTAATAATTTTTAACCTCAATTACATTTTTATATA   |
| srRNA-301  | AACTATTACTACTTTAGCAATTTATTTACATTTTAAATAATAGGGTATCT   |
| srRNA-251  | TCCTCTAGATAGACTAAAATACCGCCAAATTTTTAAGTTTCAAGAACAT    |
| srRNA-201  | ATTACAAATTTAAGTAAGGTCCATCGTGGATTATCGATTAAAAACAGGT    |
| srRNA-151  | GAATATTATTATTCTTATAAAATATTCTGATAACGACGGTATATAAACTG   |
| srRNA-101  | TTAAATATAAGCTACACCTTGATCTGATATAAATTTTTATTAAAAATTATT  |
| srRNA-51   | TTTTTCATAATTTTATTCATATAAATAAATTTATTGTAACCCATTATTAC   |
| srRNA-1    | ATCAAATTTAATCTTTATAATTTTACTACTAAATCCACTTTTAAAAAAT    |
| 28s-spacer | TTCGCTTTCGCCTTGAACCTTAGGACCGACTAACTCGTGATCAACCACTGT  |
| 5.8s-65    | CTGCGATATGCGTTCAAAATGTCGATGTTTCATGTGTCCTGCAGTTCACAC  |
| 5.8s-6     | CAGTTTGCTGCGTTCTTCATCGACCCATGAGCCGAGTGATCCACCGCTTA   |

| Oligo Name | Sequence                                            |
|------------|-----------------------------------------------------|
| 18s-1901   | TTTACTTCCTCTAAATAATCAAGTTCGGTCAACTTTTTGCGAAACAACCGT |
| 18s-1851   | AACACGCAAGGCGTCACAGTGATCACGTCCGGAGACCTCACTAAATAATT  |
| 18s-1801   | CAATCGGTAGTAGCGACGGGCGGTGTGTACAAAGGGCAGGGACGTAATCA  |
| 18s-1751   | ATGCGAGTTAATGACTCACACTTACTGGGAATTCCAAGTTCATCGTGAAC  |
| 18s-1701   | AGTTTCAGTTCACAATCCCAAGCATGAAAGTGGTTCAGCGGTTTACCCGG  |
| 18s-1651   | ACCTCTCGGTCTAGGAAATACACGTTGATACTTTCATTGTAGCGCGCGTG  |
| 18s-1601   | CAGCCCAGGACATCTAAGGGCATCACAGACCTGTTATTGCTCAATCTCAT  |
| 18s-1551   | TATTGCTAGACGCAATTTGTCCATTTAAGAAGCTAGTGTCTTATAATGG   |
| 18s-1501   | GACAAACCAACAGGTACGGCTCCACTTACATAAACACATTCAAACACAAT  |
| 18s-1451   | AAGCATTTTACTGCCAACATGAATGAAGGCTACATAAGCTTCAGCACCAT  |
| 18s-1401   | AATCCTGAAGATATCTATTTAATATATTTGAGTCTCGTTCGTTATCGGAA  |
| 18s-1351   | TTAACCAGACAAATCACTCCACGAACTAAGAACGGCCATGCACCACCACC  |
| 18s-1301   | CATAGATTCGAGAAAGAGCTATCAATCTGTCTTACACACTTATGTTTCGAC |
| 18s-1251   | CTGGTAAGTTTTCCCGTGTTGAGTCAAATTAAGCCGCAGGCTCCACTCCT  |
| 18s-1201   | GGTGGTGCCCTCCGTCAATTCCTTTAAGTTTCAGCTTTGCAACCATACT   |
| 18s-1151   | TCCCCCGGAGCCCAAAAAGCTTTGGTTTTCCCGGAAGCGACTGAGAGAGCC |
| 18s-1101   | ATAAAAGTAGCTACACCCAATTGCTAGCTGGCATCGTTTATGGTTAGAAC  |
| 18s-1051   | TAGGGCGGTATCTGATCGCCTTCGAACCTCTAACTTTTCGTTCTTGATTAA |
| 18s-1001   | TGAAAACATCTTTGGCAAATGCTTTTCGCTTAAGTTAGTCTTACGACGGTC |
| 18s-951    | CAAGAATTTACCTCTCGCGTCGTAATACTAATGCCCCCAAAGTCTTCT    |
| 18s-901    | ATTAATCATTACCTCTTGATCTGAAAACCAATGAAAGCAGAACAGAGGTC  |
| 18s-851    | TTATTTTATTATCCCATGCACAGAATATTCAGGCATTTGAAGCCTGCTTT  |
| 18s-801    | AAGCACTCTAATTTGTTCAAAGTAATAGTACCGGCCACAATAACTCG     |
| 18s-751    | TTTAAGAGCACTAATGCAGGTTTTTAATAGGAGGAACATATGAAAAAAT   |
| 18s-701    | ACAAGTATTTAATCACATATAAGAACTCCACCGGTAATACGCTTACATAC  |
| 18s-651    | ATAAAGGTATAGTACTAACCACAATTGTAAGTTGTACTACCCGTATGAAG  |
| 18s-601    | CACAAGTTCAACTACGAACGTTTTAACCGCAACAACTTTAATATACGCTA  |
| 18s-551    | TTGGAGCTGGAATTACCGCGGCTGCTGGCACCAGACTTGCCCTCCAATTG  |
| 18s-501    | GTCTTGTTAAAGGATTTAAAGTGTACTCATTCCAATTACAGGGCCTCGG   |
| 18s-451    | ATATGAGTCCTGTATTGTTATTTTCGTCACTACCTCCCCGAGCTGGGAG   |
| 18s-401    | TGGGTAATTTACGCGCCTGCTGCCTTCCTTAGATGTGGTAGCCGTTTCTC  |
| 18s-351    | AGGCTCCCTCTCCGGAATCGAACCTGATTCCCCGTTACCCGTTGCAACC   |
| 18s-301    | ATGGTAGTCTAGATACTACCATCAAAAAGTTGATAGGGCAGACATTTGAA  |
| 18s-251    | AGATCTGTCTCGGTACAAGACCATACGATCTGCATGTTATCTAGAGTTC   |
| 18s-201    | AACCAATATAACGATCTTGCATCGCTTGGTTTTAGCCTAATAAAAAGCAC  |
| 18s-151    | ACGTCCCATAAGGTTTCATGTTTTAATTGCATGTATTAGCTCTAGAATTAC |
| 18s-101    | CACAGTTATCCAAGTAAGTGTAAACGATCTAAGGAACCATAACTGATATA  |
| 18s-51     | ATGAGCCTTTTTCGGGTTTCACTTTTAATTCGTGTGTACTTAGACATGCAT |
| 18s-1      | GGCTTAATCTTTGAGACAAGCATATAACTACTGGCAGGATCAACCAGAAT  |

| Oligo Name | Sequence                                            |
|------------|-----------------------------------------------------|
| 28sR-2051  | GATCGCAGTATGGCAGCTGCTCAACCACTTACAACACCTTGCCTGTTACA  |
| 28sR-2001  | AAAGTCGTTTACAATTGATTCTAGGCTTTGTCATTGTATTAATAATGCT   |
| 28sR-1951  | TTTATATGTAAC TAGCGCGCATCAGGTGATCGAAGATCTCCCAATTFA   |
| 28sR-1901  | CTATGTTACAAATTACATTGGCATCACATCCATTGTCTGTTTATAAAGTAA |
| 28sR-1851  | ATTATAAACTTTAAATGGTTTAGAAGCCATACAATGCAAATTGCCCTTA   |
| 28sR-1801  | TTTATCATTGCAGTCCAGCACGGATACGACCTTAGAGGCGTTCAGGCATA  |
| 28sR-1751  | ATCCAACGGACGTAGCGTCATACCACTGTTGCTCGAACAAGTATTGTGC   |
| 28sR-1701  | CATTGGTCCGTACCTGCGGGTTCCTCTCGTACTACGCAGGAATGCTGTCTG |
| 28sR-1651  | CAACAACGTTTTGTATTAGTAGGGTAAACTAACCTGTCTCACGACGGT    |
| 28sR-1601  | CTAAACCCAGCTCACGTTCCCTTGCATGGGTGAACAATCCAACGCTTGGT  |
| 28sR-1551  | GAATTTTGCTTCACAATGATAGGAAGAGCCGACATCGAAGGATCAAAAAG  |
| 28sR-1501  | CGACGTCGCTATGAACGCTTGGCCGCCACAAGCCAGTTATCCCTATGGTA  |
| 28sR-1451  | ACTTTTCTGACACCTCTTGTTAAAACTCTTTAAACAAAAGGATCGATA    |
| 28sR-1401  | GGCCGAGCTTTTGCTGTCCCTGTGTGACTGAACACCGAGATCAAGTCAG   |
| 28sR-1351  | CATTGCCCCTTTTGCTCTATGTGTGGTTTCTGTCCGCACTGAGCTGGCCT  |
| 28sR-1301  | TGGGACACCTCCGTTATTATTTGAGAGATGTACCGCCCCAGTCAAACCTCC |
| 28sR-1251  | CTACCTGGCAATGTCTTGAATTGGATCATACCTGAGTAATTGGAGTTAT   |
| 28sR-1201  | ACCAAATTTTCAAATCAAAAATACATAAATGCATCGTTTTATTAAGAAT   |
| 28sR-1151  | TTGTTTGCGATTATATAACAACTCGTGATACTTTGATCAAGAAGCTTGC   |
| 28sR-1101  | ATCAAAACCCAATACCATAAGATATAATAAATATATCCGTATAATGGCTA  |
| 28sR-1051  | GGAAATGATACACGTTCCATTTAATCAAGTAAGTAAGGAAACAATAAGAG  |
| 28sR-1001  | TAGTGGTATTTCAATTGACGATACCAAACCGAGGTCTAATATCTCCCACTT |
| 28sR-951   | ATTCTACACCTCTTATGTCTCCTTACACTGCCAGATTAGAGTCAAGCTCA  |
| 28sR-901   | AAAGGGTCTTCTTTCCCGCTAATTATTCCAAGCCCGTTCCTTGGCTGT    |
| 28sR-851   | GGTTTCGCTAGATAGTAGATAGGGACAGTAGGAATCTCGTTAATCCATTC  |
| 28sR-801   | ATGCGCGTCACTAATTAGATGACGAGGCATTTGGCTACCTTAAGAGAGTC  |
| 28sR-751   | ATAGTTACTCCCGCGTTGACCCGCGCTTACTTGAATTTCTTCACTTTGA   |
| 28sR-701   | CATTCAGAGCACTGGGCAGAAATCACATTGTGTCAACACCCGCTAGGGCC  |
| 28sR-651   | ATCACAATGCTTTGTTTTAATTAGACAGTCGGATTCCCCAAGTCCGTGCC  |
| 28sR-601   | AGTTCTGAATTGATTGTTAATTGATAATCGTTATAATTAATAAGAACTAA  |
| 28sR-551   | TTGGTTTAACCCAAATAGTATTCTTAAAAATTTAGCAAGAAAGTTCCAC   |
| 28sR-501   | AATTGGCTACGTAACATAACTATCCGGGAACAAGTAACATAACATAAATG  |
| 28sR-451   | CTAGAAACTCTATTTACCCAGAACGAGCACATAAACCATGTTATTGTTTC  |
| 28sR-401   | CCAATCAAGGCCGACTATCTCAATCTTCAGAGCCAATCCTTATCCCGAAG  |
| 28sR-351   | TTACGGATCTAATTTGCCGACTTCCCTTACCTACATTATTCTATCGACTA  |
| 28sR-301   | GAGACTCTTCACCTTGGAGACCAGCTGCGGATATTGGTACGGCCTGTTGA  |
| 28sR-251   | GAAGTTTGCGTGTCCCACATAAATTTCAAGGTCCGAGGAGAAAATAT     |
| 28sR-201   | CGACACAACAGTATATGTCATGCTCTTCTAGCCCATCTACCATATCTCTC  |
| 28sR-151   | TGCGAAAGACTTCCATGGTAGTACGGCTATAAAACAGAAAAGAAAACCTCT |
| 28sR-101   | TCCGATATCTCTCGACGGCTTCTTTATGGTCGTTCTGTTGCCAGGATGA   |
| 28sR-51    | GCACGAGGCCCATATTTAATAACAAACGGATACTCAACAGGTTACGGAAT  |
| 28sR-1     | TGGAACCGTATTCCCTTTGTTCAAAATATTCAAGTGATTATAATTCCG    |

| Oligo Name | Sequence                                             |
|------------|------------------------------------------------------|
| 28sL-1751  | AACCCTTCTCCACTTCAGTCTCCAAGGCTCTCATTTCGATTATTTGCTAC   |
| 28sL-1701  | TATCCACCAAGATCTGTACCAATGGCAGCTCCATGCAGGCTTACGCCAAA   |
| 28sL-1651  | CACTTCTACGCATACCATTGTACCTTCTACTCACTAAAGTTTCAAAATT    |
| 28sL-1601  | TATATCACAAAGTAATATAAATCATCTACTTTAGCGGTAATGTATAGGTAT  |
| 28sL-1551  | ACAACCTTAAGCGCCATCCATTTTAAGGGCTAGTTGCTTCGGCAGGTGAGT  |
| 28sL-1501  | TGTTACACACTCCTTAGCGGATTTTCGACTTCCATGATCACCGTCCTGCTG  |
| 28sL-1451  | TTTTAAGCAACCAACGCCTTTTCATGGTATCTGCATGAGTTGTTAATTTGG  |
| 28sL-1401  | GCACGTAACATTACGTTTGGTTCATCCCACAGCGCCAGTTCTGCTTACCA   |
| 28sL-1351  | AAAGTGGCCCACTGGGACATTTATATCATAACCTTGATCTTCATATCAAG   |
| 28sL-1301  | AAAGTTAAGGTTCTTACCCATTTAAAGTTTGAGAATAGGTAAAGATCGTT   |
| 28sL-1251  | TCGACCCTAAGGCCTCTAATCATTTCGCTTTACCAGATAAGATTATTTTAT  |
| 28sL-1201  | ATAATATTAATAATGCACCAGCTATCCTGAGGGAAACTTCGGAAGGAACCA  |
| 28sL-1151  | GCTACTAGATGGTTTCGATTGGTCTTTTCGCCCCTATACTCAATTCTGACAA |
| 28sL-1101  | TCGATTTGCACGTCAAGACTGTTTCGGTCTTCCATCAGGGTTTCCCCTGA   |
| 28sL-1051  | CTTCAACCTGATCAAGTATAGTTCACCATCTTTCGGGTCACAGCATATAT   |
| 28sL-1001  | GCTCAAGGTACGTTCCAGTTAGAGGCATAAATAATATAAATATACATTAT   |
| 28sL-951   | ACATAACTATATAGAACGCCCCGGGATTGTGTTAATTAGCTATAAATAGC   |
| 28sL-901   | TAAAAAACTAATCCCATTATTAGTCAAGTTAATTACGCTATTAGGTTTAT   |
| 28sL-851   | ATCCCAATAACTTGCACATATGTTAGACTCCTTGGTCCGTGTTTCAAGAC   |
| 28sL-801   | GGGTCCCGAAGGTATCCTGAATCTTTCGCATTGTTAATCATACAAGTGCA   |
| 28sL-751   | TATAATAAACACAAAAATCAATGATAATTATGCCATTATATAAATCCGAA   |
| 28sL-701   | AAATTAACGCACTGTAATCATATAAATCTATCAGCACTTTATCAAATTA    |
| 28sL-651   | TAACATTTATTCTGTGTTAAATGCAAGCAATTTAATTGGAATAAACTAT    |
| 28sL-601   | AAGTTATATTTTATGATAAATTTGGTATATGCTAATAGATTACAATGTCC   |
| 28sL-551   | TTATATGGAAAAAATGCACACTATTCTCATAATATTATTTAAATATTACA   |
| 28sL-501   | ATTTTAATGATGAATTTTCCATAACGGATATTCAGGTTTCATCGGGCTTAA  |
| 28sL-451   | CCTCTAAGCAGTTTCACGTACTGTTTAACTCTCTATTTCAGAGTTCTTTTC  |
| 28sL-401   | AACTTTCCTCACGGTACTTGTGTTACTATCGGTCTCATGGTTATATTTAG   |
| 28sL-351   | TTTTAGATGGAGTTTACCACCCACTTAGTGCTGCACTATCAAGCAACACG   |
| 28sL-301   | ACTCTTTGGAACATCATCTAGTAATCATTAAACGTTATACGGGCCTCATT   |
| 28sL-251   | TAAGAAGGACTTAAATCGTTAATTTCTCATACTAGAATATTGACGCTCCA   |
| 28sL-201   | TACACTGCATCTCACATTTGCCATATAGACAAAAGTGACTTAGTGCTGAAC  |
| 28sL-151   | TGTTTTCTTTTCGCTCGCCGCTACTAAGAAAATCCTTGTTAGTTTCTTTT   |
| 28sL-101   | CCTCCCCTAATTAATATGCTTAAATTCAGGGGTAGTCCCATATGAGTTG    |
| 28sL-51    | AGGTTGTATATAACTTTATCTTGCCATAAATCTTTATATATAATGATAA    |
| 28sL-1     | AACATTTAATTAATTCGTTATAACATTTTATTAATTCCTTGATGCAAA     |
