# Supplementary material
Source: PubMed Central journal article supplement (PMC6828549)
Supplement: NIHMS1532200-supplement-Dateset2.pdf [file NIHMS1532200-supplement-Dateset2.pdf]

## Supplementary Data Set 2 - Flow cytometry gating strategy

1.

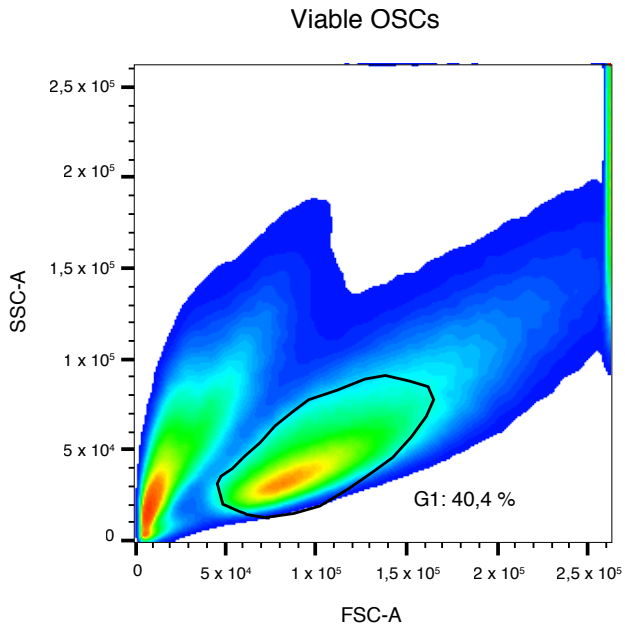

2.

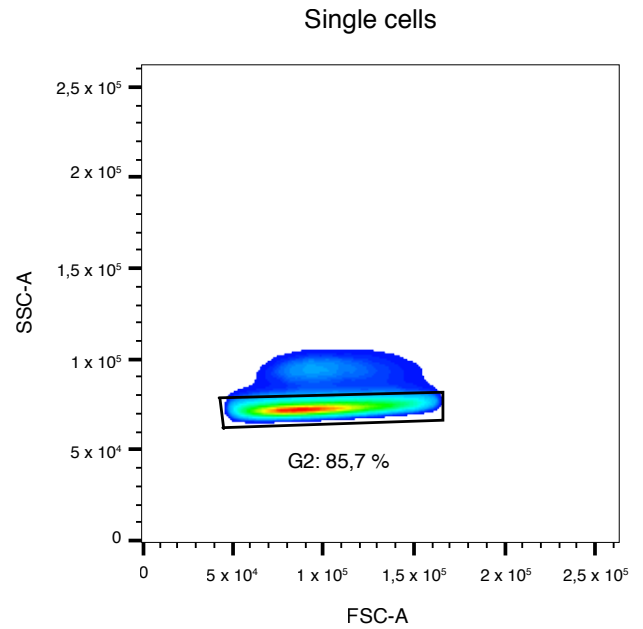

3.

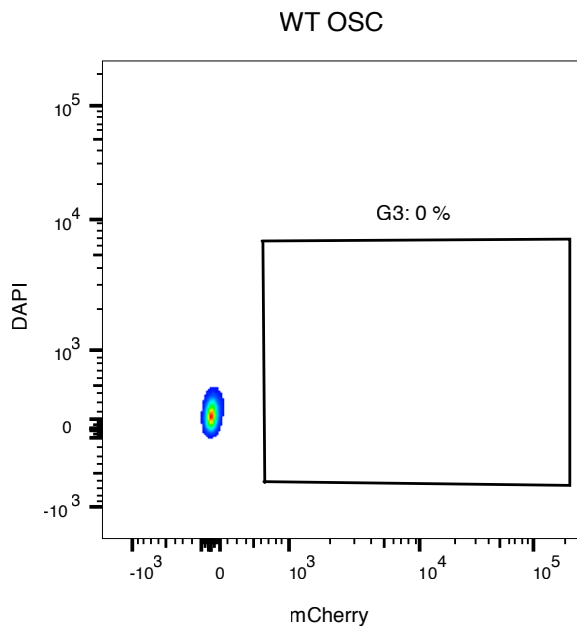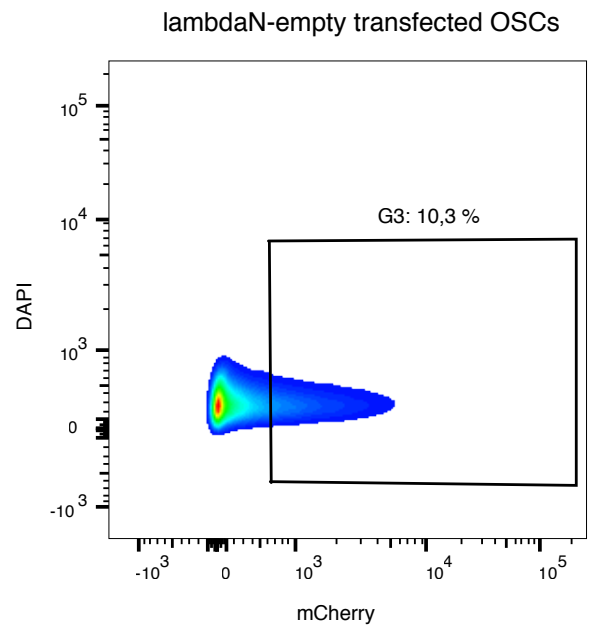

Gate 1 was set to select viable cells  
Gate 2 was set to select single cells  
Gate 3 was set to select mcherry positive cells  
mcherry positive cells were used to generate the histograms and box plots  
with the GFP intensity upon different tethering
